# Supplementary material for: Template-driven construction of [8]-imidazolium macrocycles
Source: Royal Society of Chemistry journal article supplement (doi:10.1039/d0qo01617a), 2021-01-01
Supplement: d0qo01617a1.pdf [file d0qo01617a1.pdf]

## Electronic Supplementary Information

### Template-driven construction of [8]-imidazolium macrocycles

Kai Hua,<sup>a</sup> Ming-Ming Gan,<sup>a</sup> Xue-Ru Liu,<sup>a</sup> Le Zhang,<sup>a</sup> Yuan-Yuan An<sup>\*a</sup> and  
Ying-Feng Han<sup>\*a</sup>

<sup>a</sup> Key Laboratory of Synthetic and Natural Functional Molecule of the Ministry of Education, College of Chemistry and Materials Science Northwest University, Xi'an 710127, P. R. China

E-mail: yfhan@nwu.edu.cn

yyan@nwu.edu.cn

## Table of Content

|                                                                                         |     |
|-----------------------------------------------------------------------------------------|-----|
| 1. General information                                                                  | S3  |
| 2. General procedure                                                                    | S3  |
| 3. Selected NMR, UV-Vis and MS spectra for new compounds                                | S9  |
| 4. UV-Vis, fluorescence and $^1\text{H}$ NMR titration studies on molecular recognition | S28 |
| 5. References                                                                           | S30 |

## 1. General information

N-*p*-bromoemethylbenzene-N'-cinnamicacidmethylester imidazolium bromide was synthesized according to the literature procedure.<sup>1</sup> All manipulations were performed under an nitrogen atmosphere using standard Schlenk techniques. Glassware was dried in an oven at 130 °C before use. Solvents were freshly distilled by standard procedures prior to use. <sup>1</sup>H, <sup>13</sup>C{<sup>1</sup>H} and 2D NMR spectra were recorded on Bruker AVANCE III 400, JEOL ECZ400R and JEOL ECZ600R spectrometers. Chemical shifts (δ) are expressed in ppm downfield from tetramethylsilane using the residual protonated solvent as an internal standard. All coupling constants are expressed in Hertz. Mass spectra were obtained with a Bruker microTOF-Q II mass spectrometer (Bruker Daltonics USA) in electrospray ionisation (ESI) mode. UV-vis spectra were obtained using an Agilent Cary-100 spectrophotometer.

## 2. General procedure

### 2.1 Synthesis of H<sub>4</sub>-1a(PF<sub>6</sub>)<sub>4</sub>

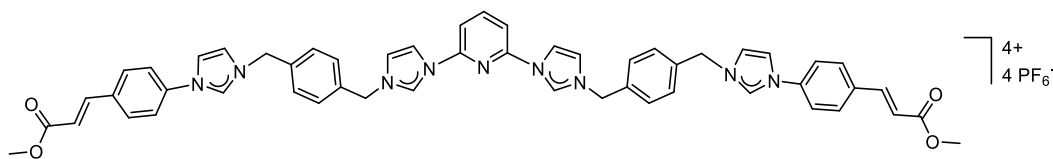

Compounds 2,6-di(1H-imidazol-1-yl)pyridine (21.0 mg, 0.1 mmol) and N-*p*-bromoemethylbenzene-N'-cinnamicacidmethylester imidazolium bromide (147.0 mg, 0.3 mmol) were added to a 25 mL Schlenk flask. To this mixture was added DMF (2.5 mL), and the reaction mixture was heated to 120 °C for 24 h. A white solid was isolated by filtration, washed with ethyl acetate and dried *in vacuo*. The obtained solid was transferred to a bottle containing 30 mL methanol. Upon addition of a solution of NH<sub>4</sub>PF<sub>6</sub> (164.0 mg, 1.0 mmol) in methanol (10 mL) to this solution, the colorless hexafluorophosphate salt H<sub>4</sub>-1a(PF<sub>6</sub>)<sub>4</sub> precipitated immediately. The precipitated solid was collected by filtration, washed with small portions of water and methanol, and dried *in vacuo*. Yield: 120.0 mg (0.080 mmol, 83%, over two steps). <sup>1</sup>H NMR (400 MHz, CD<sub>3</sub>CN): δ 9.61 (s, 2H), 9.00 (s, 2H), 8.43 (t, 1H, *J* = 8.0 Hz), 8.23 (s, 2H), 7.92 (d, 2H, *J* = 8.2 Hz), 7.86 (d, 4H, *J* = 8.4 Hz), 7.81 (s, 2H), 7.74 (d, 2H, *J* = 16.0 Hz), 7.64 (d, 4H, *J* = 8.4 Hz), 7.60 (d, 2H, *J* = 8.2 Hz), 7.55 (br, 10H), 6.64 (d, 2H, *J* = 16.0 Hz), 5.52 (s, 4H), 5.45 (s, 4H), 3.77 (s, 6H) ppm. <sup>13</sup>C{<sup>1</sup>H} NMR (100 MHz,

CD<sub>3</sub>CN):  $\delta$  167.3, 146.1, 145.6, 142.8, 137.0, 136.3, 135.7, 135.5, 135.2, 134.9, 130.5, 130.3, 130.2, 124.3, 123.9, 123.5, 122.8, 121.1, 120.8, 115.7, 53.8, 53.4, 52.1 ppm. HRMS (ESI, positive ions):  $m/z$  = 582.6545 (calcd for [H<sub>4</sub>-**1a** + 2PF<sub>6</sub>]<sup>2+</sup>, 582.6590),  $m/z$  = 218.8559 (calcd for [H<sub>4</sub>-**1a**]<sup>4+</sup>, 218.8471).

## 2.2 Synthesis of H<sub>4</sub>-**1b**(PF<sub>6</sub>)<sub>4</sub>

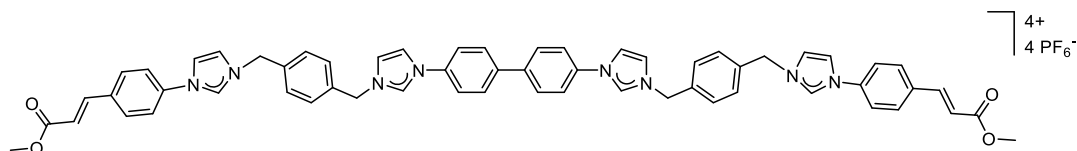

Tetrakisimidazolium salt H<sub>4</sub>-**1b**(PF<sub>6</sub>)<sub>4</sub> was synthesized as described for H<sub>4</sub>-**1a**(PF<sub>6</sub>)<sub>4</sub> from 4,4'-bis(1-imidazolyl)biphenyl (20.0 mg, 0.06 mmol), *N*-*p*-bromoemethylbenzene-*N*'-cinnamic acid methyl ester imidazolium bromide (75.0 mg, 0.15 mmol) and NH<sub>4</sub>PF<sub>6</sub> (113.1 mg, 0.69 mmol). Yield: 75.0 mg (0.050 mmol, 71%, over two steps). <sup>1</sup>H NMR (400 MHz, CD<sub>3</sub>CN):  $\delta$  9.06 (s, 2H), 9.01 (s, 2H), 7.96 (d, 4H,  $J$  = 8.6 Hz), 7.88 (s, 2H), 7.86 (s, 4H), 7.83-7.82 (m, 2H), 7.76 (d, 2H,  $J$  = 16.0 Hz), 7.73 (s, 2H), 7.72 (s, 1H), 7.65 (d, 4H,  $J$  = 8.6 Hz), 7.58-7.55 (m, 5H), 7.54 (s, 8H), 6.64 (d, 2H,  $J$  = 16.0 Hz), 5.48 (s, 4H), 5.46 (s, 4H), 3.77 (s, 6H) ppm. <sup>13</sup>C{<sup>1</sup>H} NMR (150 MHz, CD<sub>3</sub>CN):  $\delta$  167.3, 142.7, 141.2, 136.7, 136.1, 135.4, 135.1, 135.0, 134.9, 130.3, 130.1, 129.4, 123.7, 123.6, 123.4, 123.3, 122.7, 122.6, 120.7, 53.2, 52.0 ppm. HRMS (ESI, positive ions):  $m/z$  = 365.1406 (calcd for [H<sub>4</sub>-**1b** + PF<sub>6</sub>]<sup>3+</sup>, 365.1298),  $m/z$  = 237.6204 (calcd for [H<sub>4</sub>-**1b**]<sup>4+</sup>, 237.6062).

## 2.3 Synthesis of [Ag<sub>4</sub>(**1a**)<sub>2</sub>](PF<sub>6</sub>)<sub>4</sub>

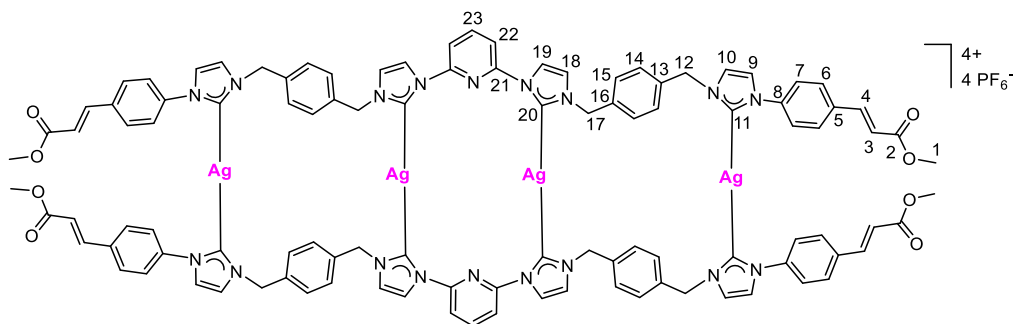

A sample of H<sub>4</sub>-**1a**(PF<sub>6</sub>)<sub>4</sub> (50.0 mg, 0.03 mmol) was dissolved in 15 mL of CH<sub>3</sub>CN, and Ag<sub>2</sub>O was added to this solution (40.0 mg, 0.17 mmol). The resulting suspension

was heated to 65 °C for 24 h under exclusion of light. After cooling to ambient temperature, the obtained suspension was filtered slowly through a short pad of Celite to obtain a clear solution. The filtrate was concentrated to 2 mL and diethyl ether (15 mL) was added. This led to the precipitation of a white solid. The solid was collected by filtration, washed with diethyl ether and dried *in vacuo* to give  $[\text{Ag}_4(\mathbf{1a})_2](\text{PF}_6)_4$ , as a colorless solid. Yield: 40.0 mg (0.014 mmol, 88%).  $^1\text{H}$  NMR (400 MHz,  $\text{CD}_3\text{CN}$ ):  $\delta$  8.33 (t, 2H,  $J = 8.0$  Hz, H23), 7.91-7.88 (m, 4H), 7.79 (d, 4H,  $J = 8.0$  Hz), 7.56 (d, 4H,  $J = 16.0$  Hz, H4), 7.48-7.47 (m, 8H), 7.45 (s, 16H), 7.37-7.35 (m, 4H), 7.23 (d, 8H,  $J = 8.0$  Hz), 7.01 (d, 8H,  $J = 8.0$  Hz), 6.45 (d, 4H,  $J = 16.0$  Hz, H3), 5.24 (s, 8H, H17/H12), 4.73 (br, 8H, H17/H12), 3.77 (s, 12H, H1) ppm.  $^{13}\text{C}\{^1\text{H}\}$  NMR (150 MHz,  $\text{CD}_3\text{CN}$ ):  $\delta$  183.7 (C11/C20), 180.5 (C11/C20), 167.5 (C2), 149.8, 144.6, 143.4, 141.6, 137.4, 137.1, 135.6, 130.0, 129.4, 129.1, 125.0, 124.5, 123.5, 120.7, 120.3, 115.0, 55.7 (C17/C12), 52.2 (C1) ppm. HRMS (ESI, positive ions):  $m/z = 773.1167$  (calcd for  $[\text{Ag}_4(\mathbf{1a})_2 + \text{PF}_6]^{3+}$  773.1005),  $m/z = 543.5964$  (calcd for  $[\text{Ag}_4(\mathbf{1a})_2]^{4+}$  543.5842).

## 2.4 Synthesis of $[\text{Ag}_4(\mathbf{1b})_2](\text{PF}_6)_4$

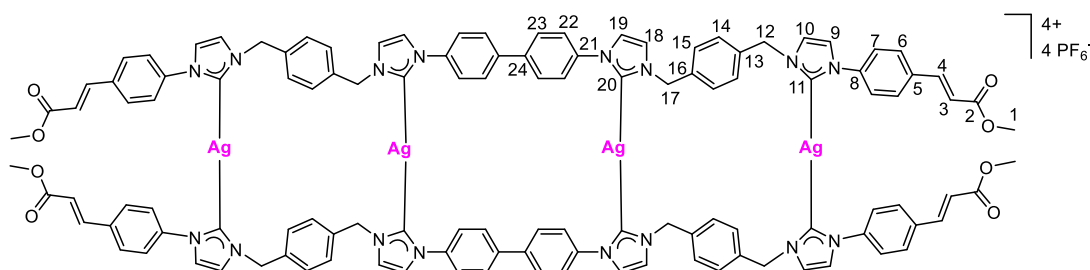

Complex  $[\text{Ag}_4(\mathbf{1b})_2](\text{PF}_6)_4$  was synthesized as described for  $[\text{Ag}_4(\mathbf{1a})_2](\text{PF}_6)_4$  from  $\text{H}_4\text{-}\mathbf{1b}(\text{PF}_6)_4$  (40.0 mg, 0.03 mmol) and  $\text{Ag}_2\text{O}$  (50.0 mg, 0.22 mmol) in 20 mL of acetonitrile at 65 °C for 24 h under exclusion of light. Yield: 33.0 mg (0.011 mmol, 87%).  $^1\text{H}$  NMR (600 MHz,  $\text{CD}_3\text{CN}$ ):  $\delta$  7.62 (m, 16H, H22/H23), 7.57 (d, 4H,  $J = 16.0$  Hz, H4), 7.54 (s, 4H, H9), 7.52 (br, 16H, H7/H6), 7.50 (s, 4H, H10), 7.42 (s, 4H, H18), 7.40 (s, 4H, H19), 7.19 (d, 8H,  $J = 7.4$  Hz, H14), 7.16 (d, 8H,  $J = 7.4$  Hz, H15), 6.46 (d, 4H,  $J = 16.0$  Hz, H3), 5.27 (s, 8H, H12), 5.22 (s, 8H, H17), 3.77 (s, 12H, H1) ppm.  $^{13}\text{C}\{^1\text{H}\}$  NMR (150 MHz,  $\text{CD}_3\text{CN}$ ):  $\delta$  181.3 (C11/C20), 167.5 (C2), 143.4 (C4), 141.8 (C24), 140.4 (C22), 139.1 (21), 137.8 (16), 135.7 (C5), 130.2 (C6), 128.9 (C13), 128.8 (C14), 126.3 (C15), 125.4 (C7), 125.1 (C23), 124.2 (C18), 124.1 (C9), 123.5 (C10), 123.3 (C19), 120.4 (C3), 55.6 (C17/C12), 52.3 (C1) ppm. HRMS (ESI,

positive ions):  $m/z = 823.1503$  (calcd for  $[\text{Ag}_4(\mathbf{1b})_2 + \text{PF}_6]^{3+}$  823.1246),  $m/z = 581.1319$  (calcd for  $[\text{Ag}_4(\mathbf{1b})_2]^{4+}$  581.1022).

## 2.5 Synthesis of $[\text{Ag}_4(\mathbf{2a})](\text{PF}_6)_4$

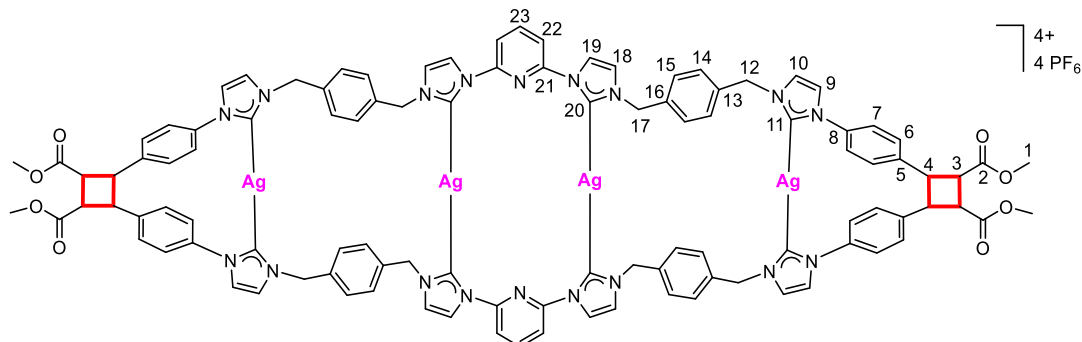

A solution of  $[\text{Ag}_4(\mathbf{1a})_2](\text{PF}_6)_4$  (40.0 mg, 0.014 mmol) in  $\text{CD}_3\text{CN}$  (0.5 mL) in an NMR tube was irradiated with a Philips mercury high-pressure lamp ( $\lambda = 365$  nm) at ambient temperature for 24 h. Over this time the initially colorless solution turned brown. The conversion to  $[\text{Ag}_4(\mathbf{2a})](\text{PF}_6)_4$  was quantitative, as judged by  $^1\text{H}$  NMR spectroscopy.  $^1\text{H}$  NMR (400 MHz,  $\text{CD}_3\text{CN}$ ):  $\delta$  8.28 (t, 2H,  $J = 8.0$  Hz, H23), 7.93-7.89 (m, 4H), 7.77 (s, 2H), 7.75 (s, 2H), 7.50-7.46 (m, 4H), 7.39-7.37 (m, 4H), 7.36 (s, 4H), 7.34 (s, 4H), 7.33 (s, 4H), 7.15-7.11 (m, 16H), 6.93 (s, 8H), 5.37 (s, 8H, H17/H12), 4.85 (br, 8H, H17/H12), 4.41 (s, 4H, H4), 4.02 (s, 4H, H3), 3.70 (s, 12H, H1) ppm.  $^{13}\text{C}\{^1\text{H}\}$  NMR (150 MHz,  $\text{CD}_3\text{CN}$ ):  $\delta$  180.7 (C11/C20), 173.4 (C2), 149.6, 144.2, 139.9, 138.9, 137.3, 129.1, 128.7, 125.2, 124.0, 123.9, 122.4, 120.9, 114.9, 55.6 (C17/C12), 52.3 (C1), 45.8 (C4), 41.2 (C3) ppm. HRMS (ESI, positive ions):  $m/z = 543.5932$  (calcd for  $[\text{Ag}_4(\mathbf{2a})_2]^{4+}$  543.5842).

## 2.6 Synthesis of $[\text{Ag}_4(\mathbf{2b})](\text{PF}_6)_4$

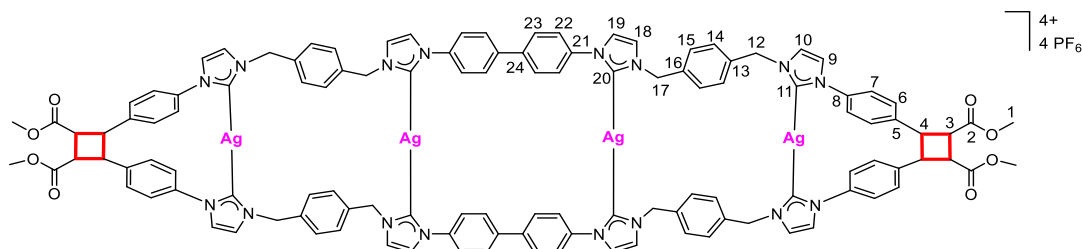

Complex  $[\text{Ag}_4(\mathbf{2b})](\text{PF}_6)_4$  was synthesized as described for  $[\text{Ag}_4(\mathbf{2a})](\text{PF}_6)_4$  from  $[\text{Ag}_4(\mathbf{1b})_2](\text{PF}_6)_4$  (33.0 mg, 0.011 mmol) in  $\text{CD}_3\text{CN}$  (0.5 mL).  $^1\text{H}$  NMR (600 MHz,  $\text{CD}_3\text{CN}$ ):  $\delta$  7.64 (s, 16H, H22/H23), 7.55 (d, 4H,  $J = 1.8$  Hz, H10), 7.45 (d, 4H,  $J =$

1.8 Hz, H9), 7.43 (d, 4H,  $J = 1.8$  Hz, H19), 7.37 (d, 4H,  $J = 1.8$  Hz, H18), 7.19 (d, 8H,  $J = 8.2$  Hz, H14), 7.16 (s, 8H, H7/H6), 7.13 (d, 8H,  $J = 8.2$  Hz, H15), 6.95 (s, 8H, H7/H6), 5.45 (s, 8H, H12), 5.38 (s, 8H, H17), 4.42 (s, 4H, H4), 4.02 (s, 4H, H3), 3.71 (s, 12H, H1) ppm.  $^{13}\text{C}\{^1\text{H}\}$  NMR (150 MHz,  $\text{CD}_3\text{CN}$ ):  $\delta$  182.0 (C20), 180.7 (C11), 173.7 (C2), 140.3 (C6), 140.2 (C5), 139.3 (C24/C21), 139.1 (C8), 137.9 (C16), 137.5 (C13), 128.6 (14), 128.4 (15), 128.3 (C22), 125.5 (C7), 125.3 (C23), 123.9 (C10), 123.8 (C9), 123.7 (C19), 123.5 (C18), 55.7 (C12), 55.3 (C17), 52.6 (C1), 46.1 (C4), 41.5 (C3) ppm. HRMS (ESI, positive ions):  $m/z = 581.1019$  (calcd for  $[\text{Ag}_4(\mathbf{2b})_2]^{4+}$  581.1022).

## 2.7 Synthesis of $\text{H}_8\text{-2a}(\text{PF}_6)_8$

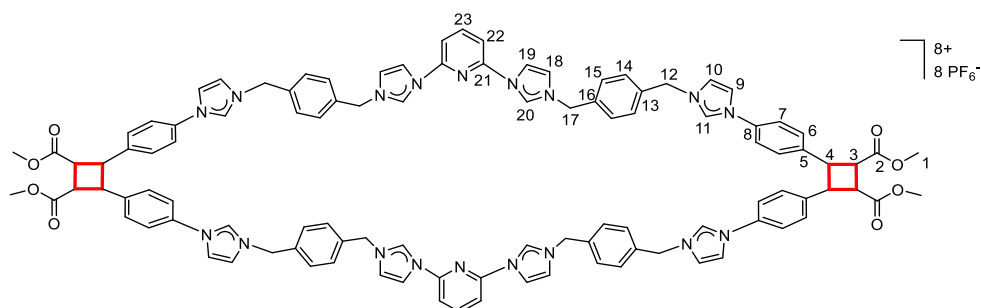

A sample of  $[\text{Ag}_4(\mathbf{2a})](\text{PF}_6)_4$  (40.0 mg, 0.014 mmol) was dissolved in a mixture of MeOH (30 mL) and  $\text{CD}_3\text{CN}$  (0.5 mL), and  $\text{NH}_4\text{Cl}$  (14.0 mg, 0.262 mmol) was added to this solution. A white solid ( $\text{AgCl}$ ) precipitated immediately. The reaction mixture was stirred for 4 h. The resulting suspension was filtered through Celite to obtain a clear solution. The solvent was removed from this solution to give a white solid. The white solid was dissolved in MeOH (15 mL) and a solution of  $\text{NH}_4\text{PF}_6$  (80.0 mg, 0.15 mmol) in methanol (5 mL) was added. The mixture was stirred at ambient temperature for 8 h. After this period a white solid precipitated, which was isolated by filtration, washed with water and methanol, and dried *in vacuo*. Yield: 35.0 mg (0.012 mmol, 86%).  $^1\text{H}$  NMR (400 MHz,  $\text{CD}_3\text{CN}$ ):  $\delta$  10.39 (s, 4H, H20/H11), 8.96 (s, 4H, H20/H11), 8.43 (t, 2H,  $J = 8.2$  Hz, H23), 8.23 (s, 4H), 7.93 (s, 2H), 7.91 (s, 2H), 7.64 (s, 4H), 7.59 (s, 4H), 7.55 (d, 8H,  $J = 8.0$  Hz), 7.49 (s, 4H), 7.47 (d, 8H,  $J = 8.0$  Hz), 7.35 (d, 8H,  $J = 8.4$  Hz), 7.27 (d, 8H,  $J = 8.4$  Hz), 5.53 (s, 8H, H17/H12), 5.39 (s, 8H, H17/H12), 4.50 (s, 4H, H4), 4.00 (s, 4H, H3), 3.71 (s, 12H, H1) ppm. HRMS (ESI, positive ions):  $m/z = 825.5483$  (calcd for  $[\text{H}_8\text{-2a} + 5\text{PF}_6]^{3+}$  825.5346),  $m/z = 582.9164$  (calcd for  $[\text{H}_8\text{-2a} + 4\text{PF}_6]^{4+}$  582.9098).

## 2.8 Synthesis of H<sub>8</sub>-2b(PF<sub>6</sub>)<sub>8</sub>

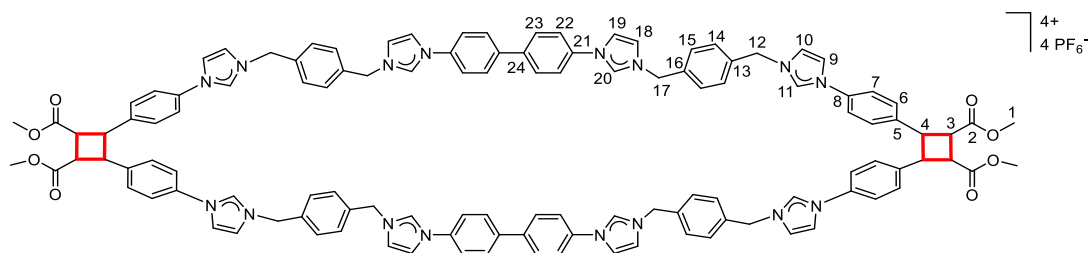

Octakisimidazolium salt H<sub>8</sub>-**2b**(PF<sub>6</sub>)<sub>8</sub> was synthesized as described for H<sub>8</sub>-**2a**(PF<sub>6</sub>)<sub>8</sub> from [Ag<sub>4</sub>(**2b**)](PF<sub>6</sub>)<sub>4</sub> (36.0 mg, 0.012 mmol), NH<sub>4</sub>Cl (14.0 mg, 0.262 mmol) and NH<sub>4</sub>PF<sub>6</sub> (102.0 mg, 0.520 mmol). Yield: 36.0 mg (0.011 mmol, 94%). <sup>1</sup>H NMR (600 MHz, CD<sub>3</sub>CN):  $\delta$  9.08 (s, 4H, H<sub>20</sub>), 8.94 (s, 4H, H<sub>11</sub>), 7.92 (d, 8H,  $J$  = 8.4 Hz, H<sub>15</sub>), 7.83 (s, 4H, H<sub>9</sub>), 7.72 (d, 8H,  $J$  = 8.4 Hz, H<sub>14</sub>), 7.65 (s, 4H, H<sub>19</sub>), 7.56 (s, 4H, H<sub>10</sub>), 7.55-7.49 (m, 16H, H<sub>22</sub>/H<sub>23</sub>), 7.46 (s, 4H, H<sub>18</sub>), 7.38 (d, 8H,  $J$  = 8.4 Hz, H<sub>7</sub>), 7.30 (d, 8H,  $J$  = 8.4 Hz, H<sub>6</sub>), 5.45 (s, 8H, H<sub>12</sub>), 5.41 (s, 8H, H<sub>17</sub>), 4.50 (s, 4H, H<sub>4</sub>), 4.00 (s, 4H, H<sub>3</sub>), 3.71 (s, 12H, H<sub>1</sub>) ppm. <sup>13</sup>C{<sup>1</sup>H} NMR (150 MHz, CD<sub>3</sub>CN):  $\delta$  173.4 (C<sub>2</sub>), 142.1 (C<sub>5</sub>), 141.7 (C<sub>23</sub>), 141.5 (C<sub>16</sub>), 135.7 (C<sub>21</sub>), 135.6 (C<sub>13</sub>), 135.5 (C<sub>11</sub>), 135.3 (C<sub>20</sub>), 134.1 (C<sub>8</sub>), 130.7 (C<sub>6</sub>), 130.5 (C<sub>22</sub>), 129.8 (C<sub>15</sub>), 124.1 (C<sub>10</sub>), 123.9 (C<sub>19</sub>), 123.8 (C<sub>14</sub>), 123.7 (C<sub>18</sub>), 123.1 (C<sub>9</sub>), 122.9 (C<sub>7</sub>), 53.6 (C<sub>12</sub>), 53.5 (C<sub>17</sub>), 52.7 (C<sub>1</sub>), 45.2 (C<sub>4</sub>), 43.4 (C<sub>3</sub>) ppm. HRMS (ESI, positive ions):  $m/z$  = 1385.8143 (calcd for [H<sub>8</sub>-**2b** + 6PF<sub>6</sub>]<sup>2+</sup> 1385.8203),  $m/z$  = 875.5479 (calcd for [H<sub>8</sub>-**2b** + 5PF<sub>6</sub>]<sup>3+</sup> 875.5587),  $m/z$  = 620.4241 (calcd for [H<sub>8</sub>-**2b** + 4PF<sub>6</sub>]<sup>4+</sup> 620.4278),  $m/z$  = 467.3423 (calcd for [H<sub>8</sub>-**2b** + 3PF<sub>6</sub>]<sup>5+</sup> 467.3493).



### 3. Selected NMR, UV-vis and MS spectra for new compounds

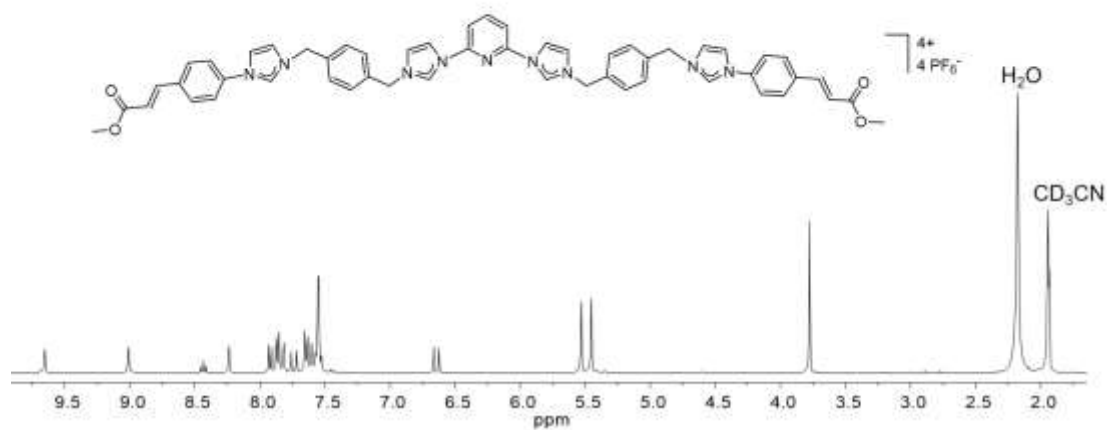

**Fig. S1** <sup>1</sup>H NMR spectrum of H<sub>4</sub>-1a(PF<sub>6</sub>)<sub>4</sub> (400 MHz, CD<sub>3</sub>CN).

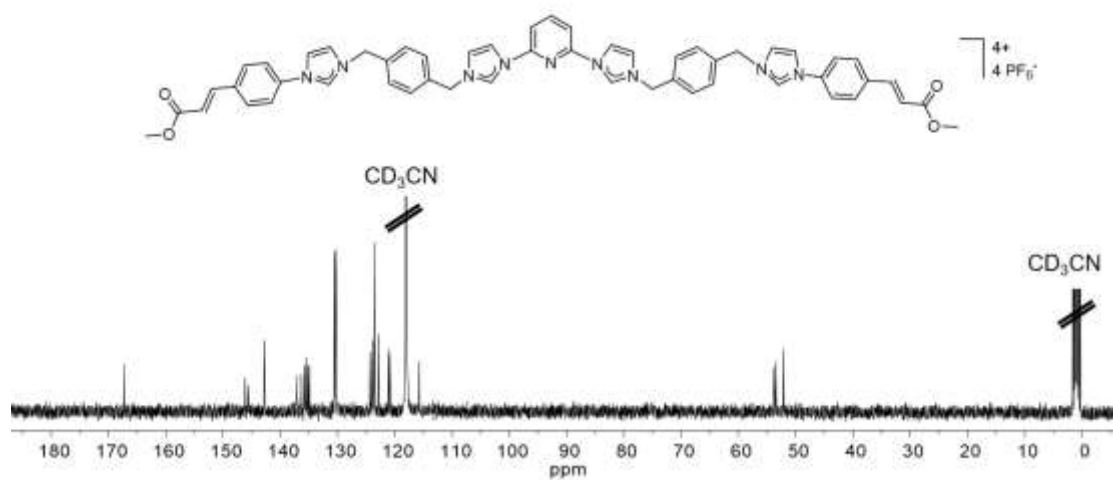

**Fig. S2** <sup>13</sup>C{<sup>1</sup>H} NMR spectrum of H<sub>4</sub>-1a(PF<sub>6</sub>)<sub>4</sub> (100 MHz, CD<sub>3</sub>CN).

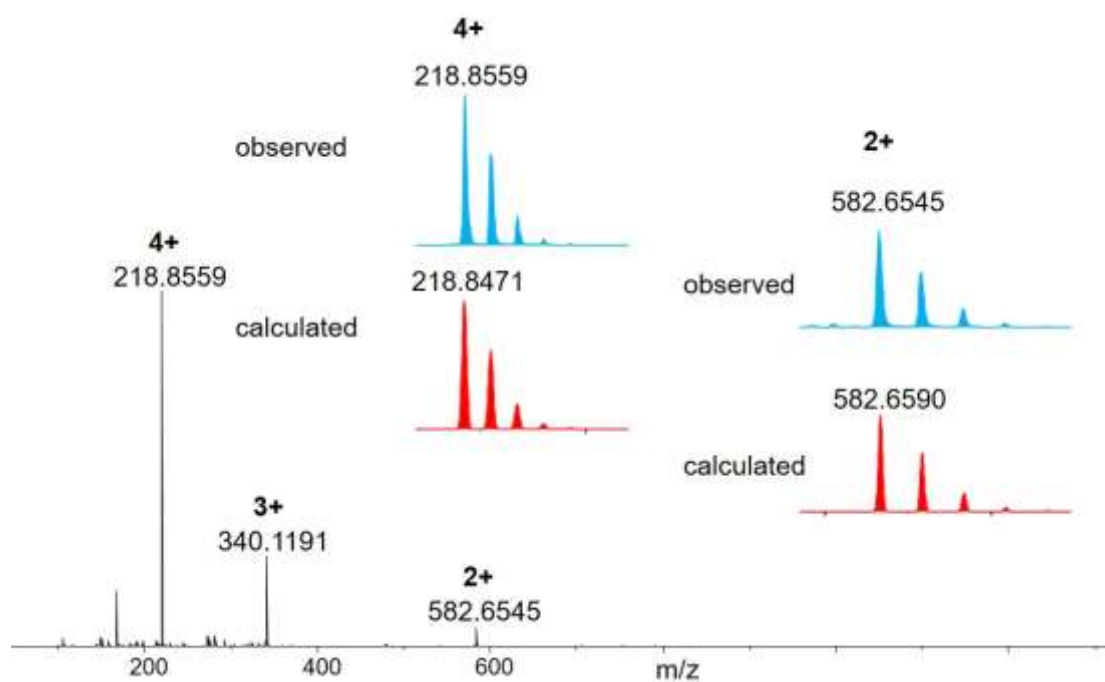

**Fig. S3** HR-ESI mass spectrum (positive ions) of  $\text{H}_4\text{-1a}(\text{PF}_6)_4$ .

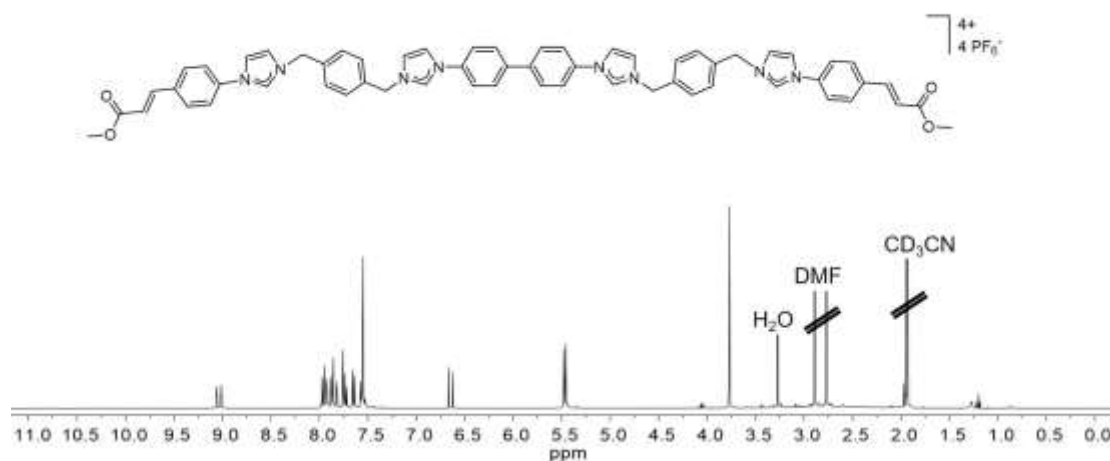

**Fig. S4**  $^1\text{H}$  NMR spectrum of  $\text{H}_4\text{-1b}(\text{PF}_6)_4$  (400 MHz,  $\text{CD}_3\text{CN}$ ).

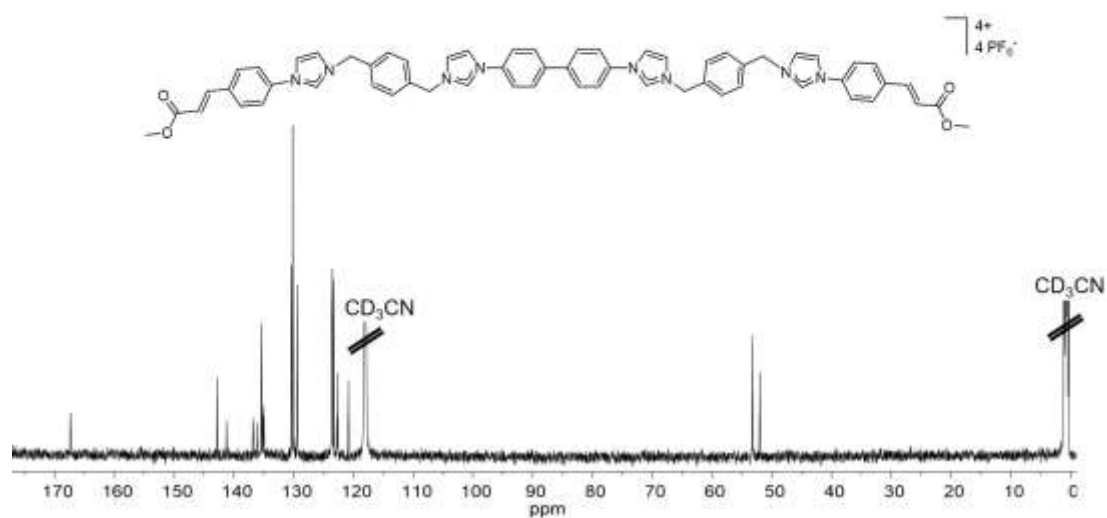

**Fig. S5**  $^{13}\text{C}\{^1\text{H}\}$  NMR spectrum of  $\text{H}_4\text{-1b}(\text{PF}_6)_4$  (150 MHz,  $\text{CD}_3\text{CN}$ ).

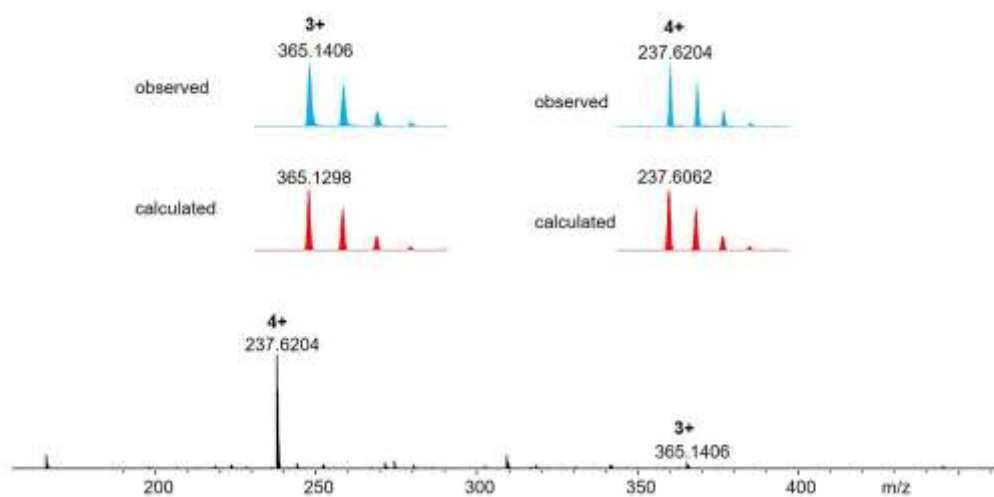

**Fig. S6** HR-ESI mass spectrum (positive ions) of  $\text{H}_4\text{-1b}(\text{PF}_6)_4$ .

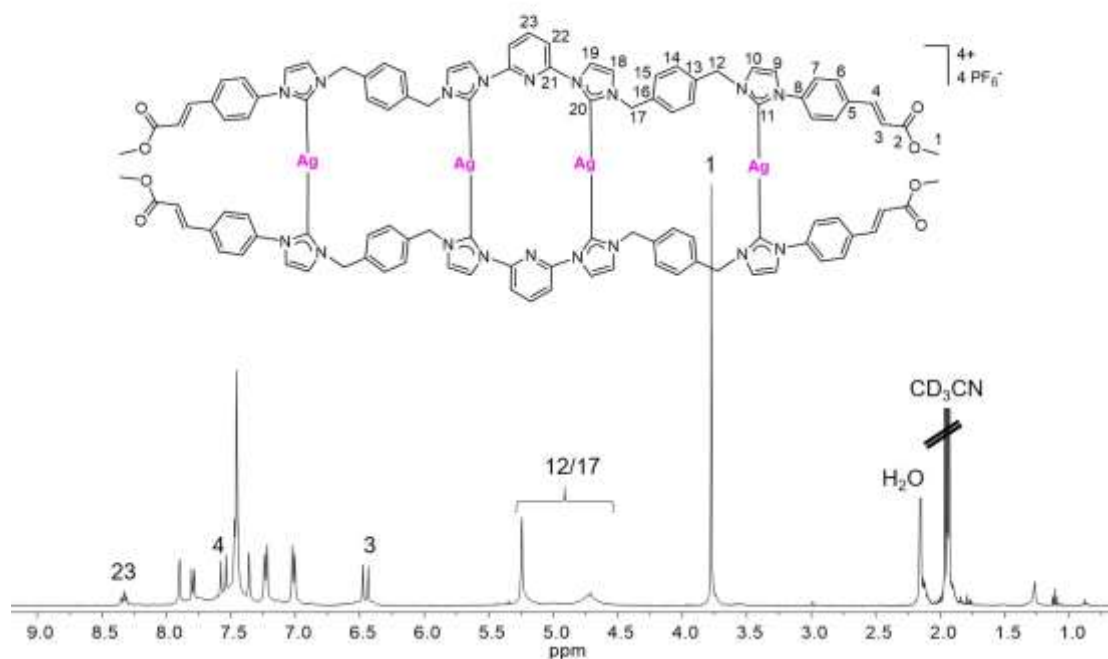

**Fig. S7**  $^1\text{H}$  NMR spectrum of  $[\text{Ag}_4(\mathbf{1a})_2](\text{PF}_6)_4$  (400 MHz,  $\text{CD}_3\text{CN}$ ).

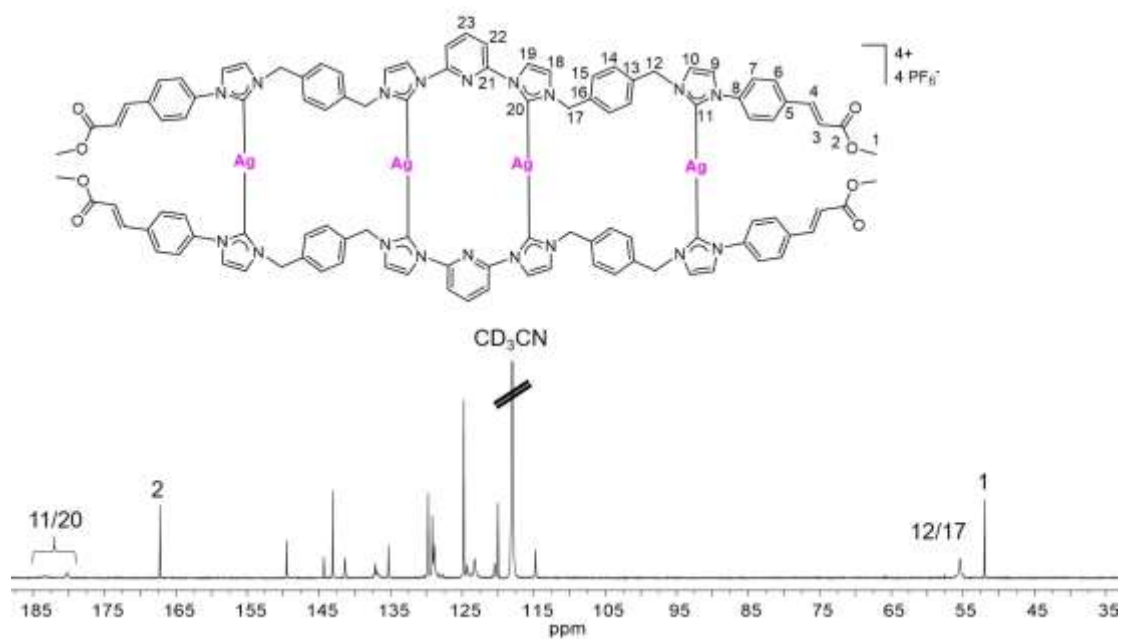

**Fig. S8**  $^{13}\text{C}\{^1\text{H}\}$  NMR spectrum of  $[\text{Ag}_4(\mathbf{1a})_2](\text{PF}_6)_4$  (150 MHz,  $\text{CD}_3\text{CN}$ ).

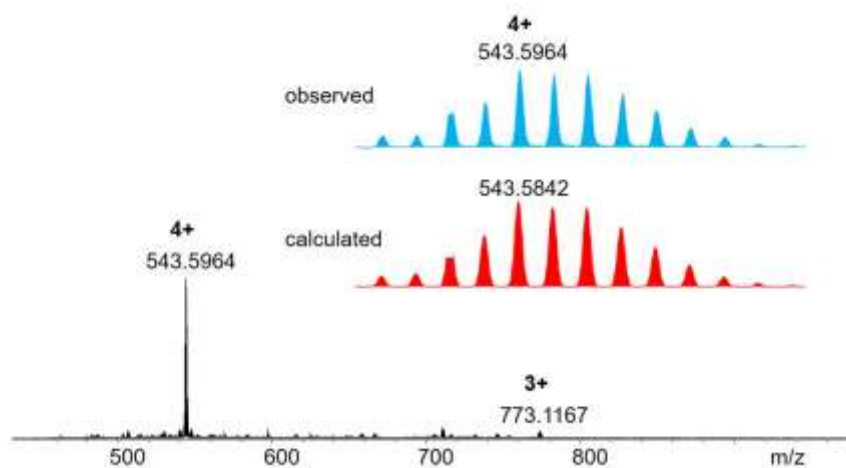

**Fig. S9** HR-ESI mass spectrum (positive ions) of  $[\text{Ag}_4(\mathbf{1a})_2](\text{PF}_6)_4$ .

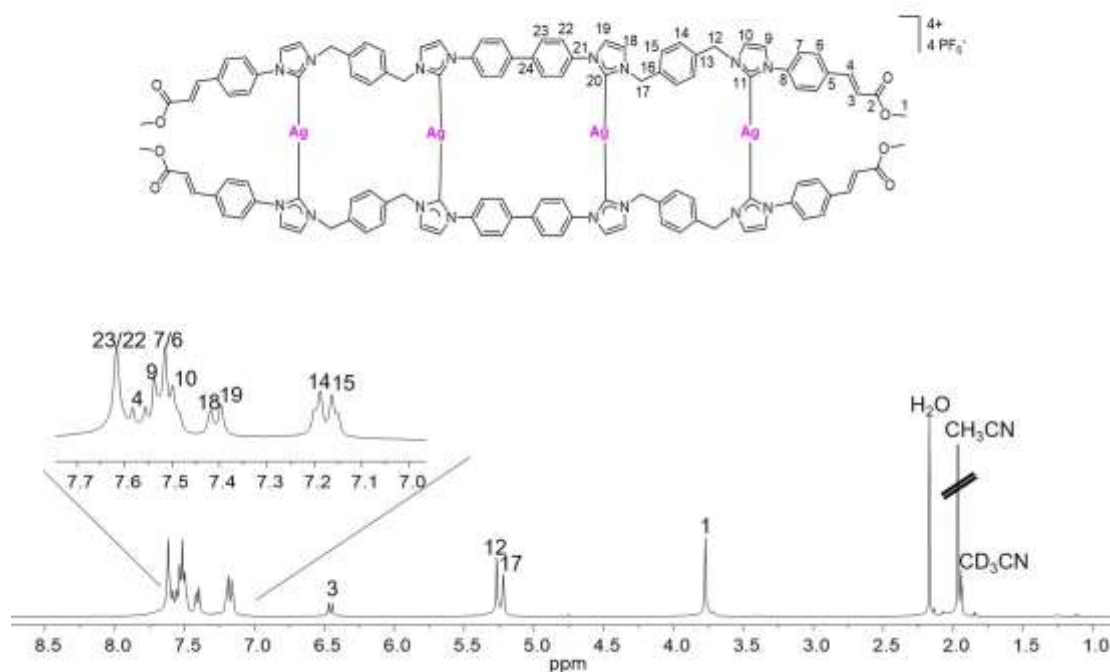

**Fig. S10**  $^1\text{H}$  NMR spectrum of  $[\text{Ag}_4(\mathbf{1b})_2](\text{PF}_6)_4$  (600 MHz,  $\text{CD}_3\text{CN}$ ).

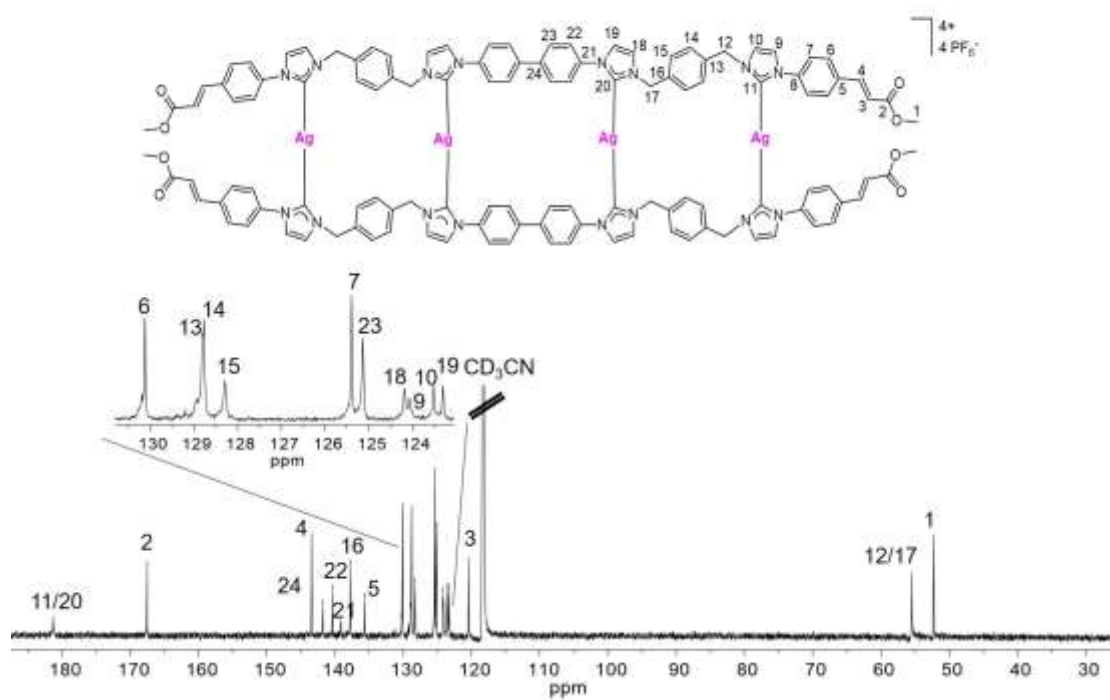

**Fig. S11**  $^{13}\text{C}\{^1\text{H}\}$  NMR spectrum of  $[\text{Ag}_4(\mathbf{1b})_2](\text{PF}_6)_4$  (150 MHz,  $\text{CD}_3\text{CN}$ ).

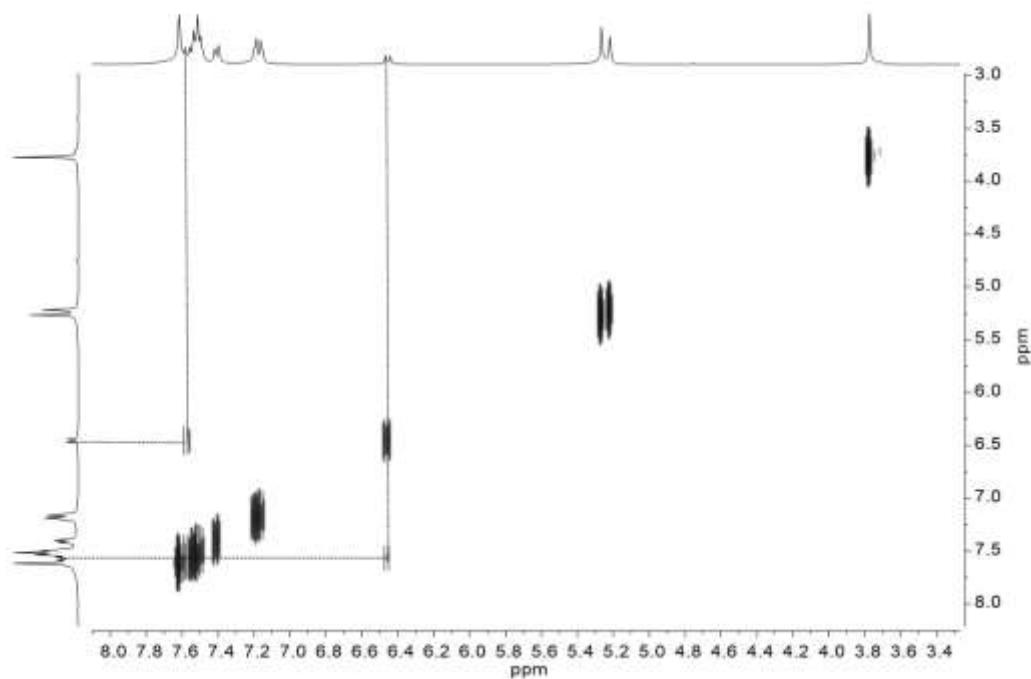

**Fig. S12**  $^1\text{H}$ - $^1\text{H}$  COSY NMR spectrum of  $[\text{Ag}_4(\mathbf{1b})_2](\text{PF}_6)_4$  (600 MHz,  $\text{CD}_3\text{CN}$ ).

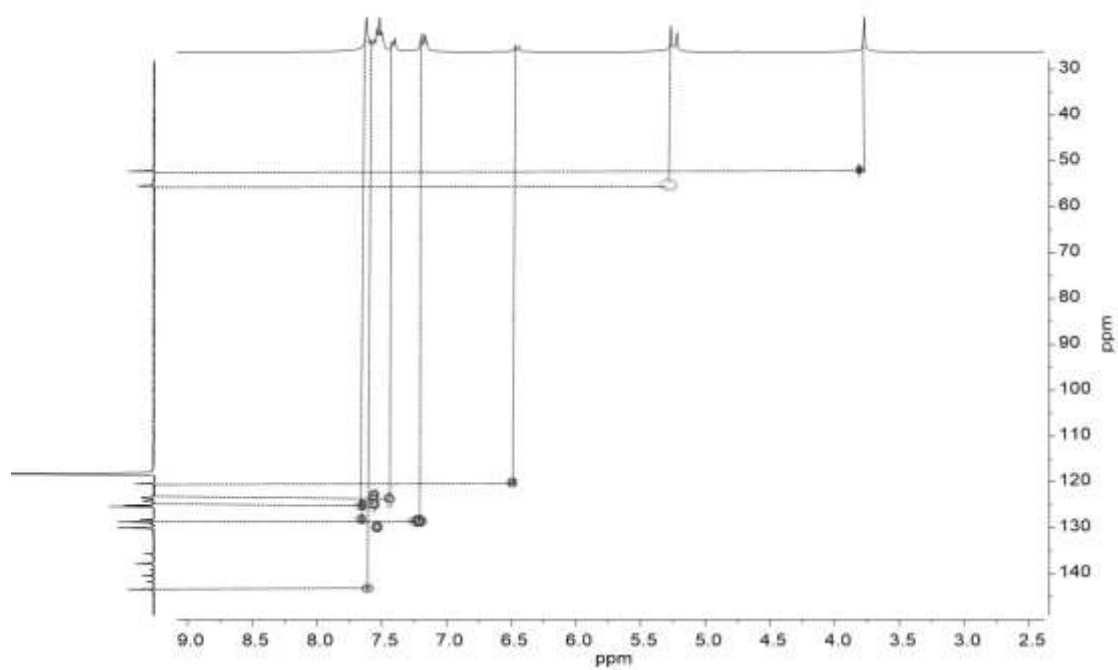

**Fig. S13**  $^1\text{H}$ - $^{13}\text{C}$  HSQC NMR spectrum of  $[\text{Ag}_4(\mathbf{1b})_2](\text{PF}_6)_4$  (600 MHz,  $\text{CD}_3\text{CN}$ ).

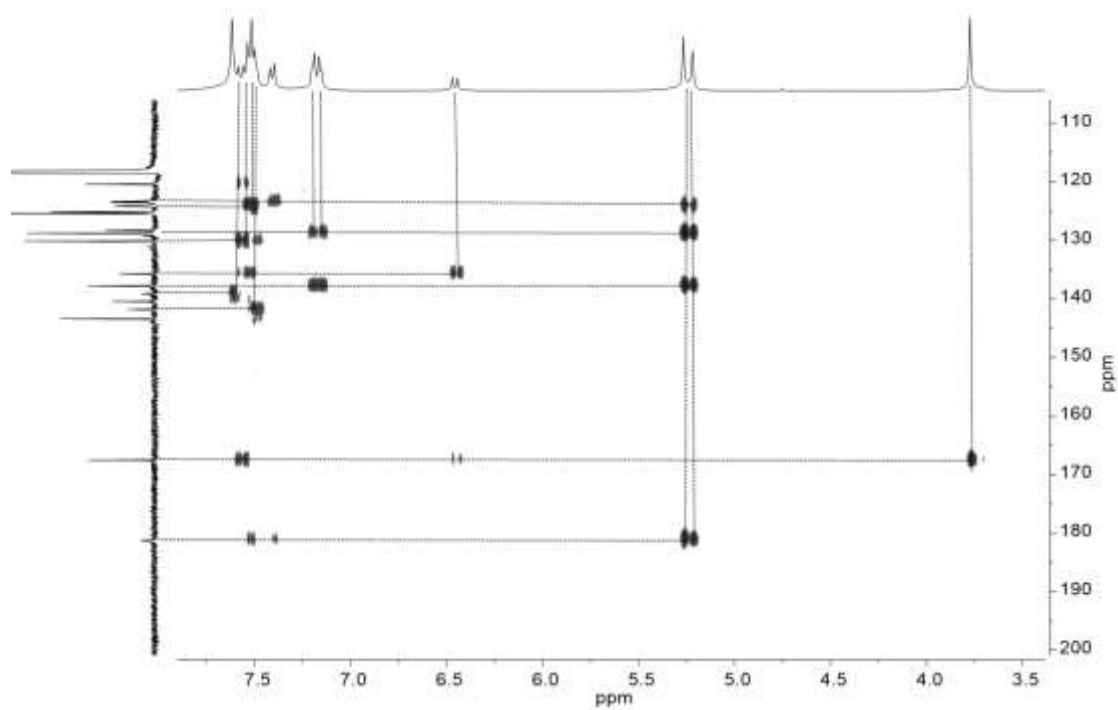

**Fig. S14**  $^1\text{H}$ - $^{13}\text{C}$  HMBC NMR spectrum of  $[\text{Ag}_4(\mathbf{1b})_2](\text{PF}_6)_4$  (600 MHz,  $\text{CD}_3\text{CN}$ ).

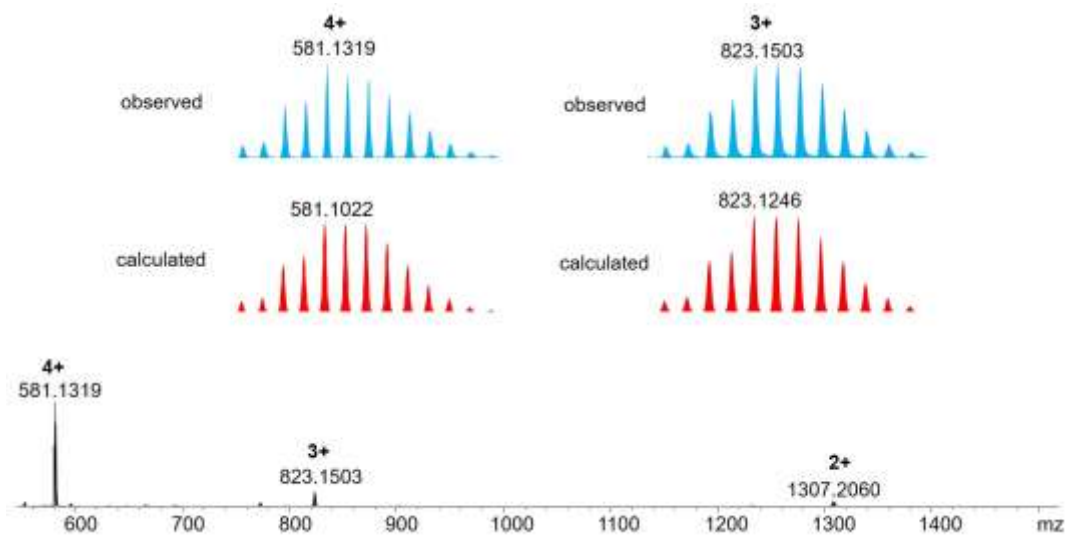

**Fig. S15** HR-ESI mass spectrum (positive ions) of [Ag<sub>4</sub>(1b)<sub>2</sub>](PF<sub>6</sub>)<sub>4</sub>.

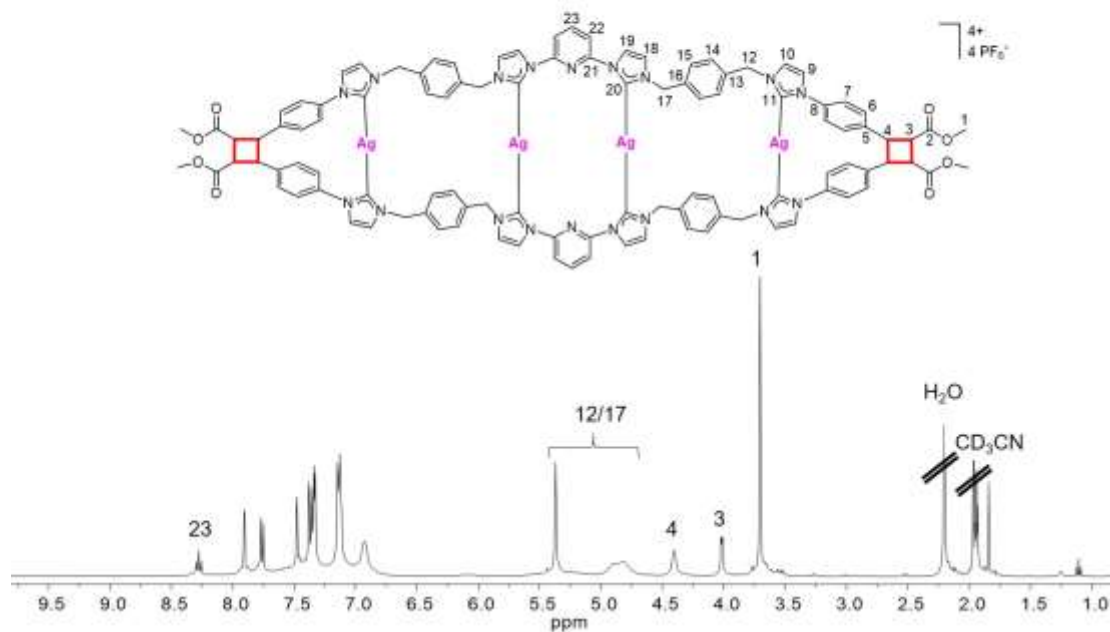

**Fig. S16** <sup>1</sup>H NMR spectrum of [Ag<sub>4</sub>(2a)](PF<sub>6</sub>)<sub>4</sub> (600 MHz, CD<sub>3</sub>CN).



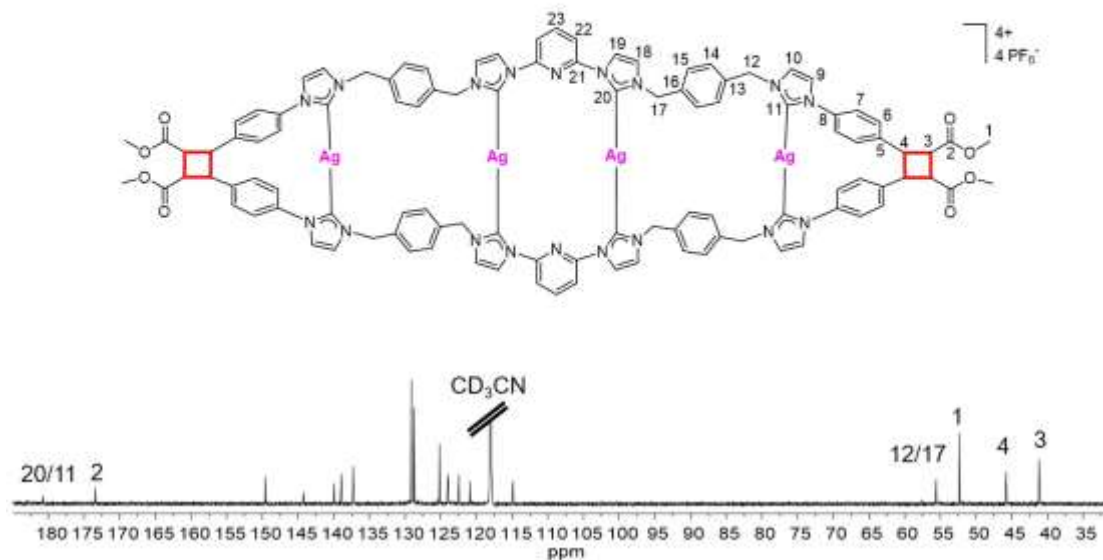

**Fig. S17**  $^{13}\text{C}\{^1\text{H}\}$  NMR spectrum of  $[\text{Ag}_4(\mathbf{2a})](\text{PF}_6)_4$  (150 MHz,  $\text{CD}_3\text{CN}$ ).

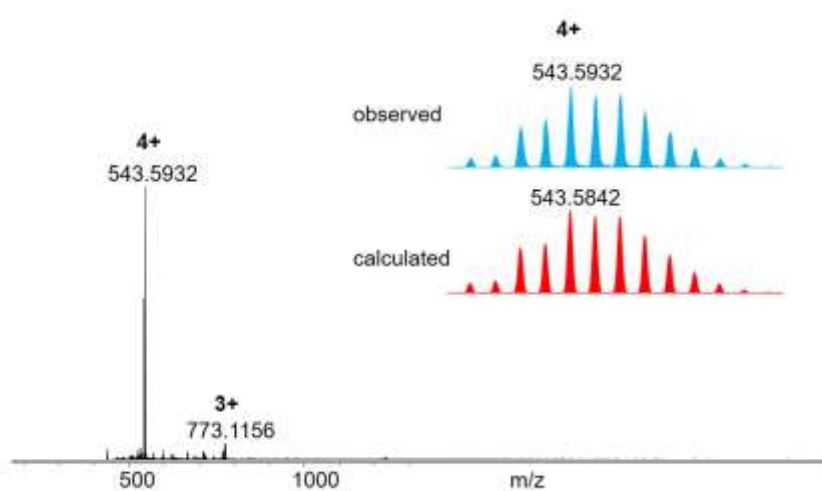

**Fig. S18** HR-ESI mass spectrum (positive ions) of  $[\text{Ag}_4(\mathbf{2a})](\text{PF}_6)_4$ .

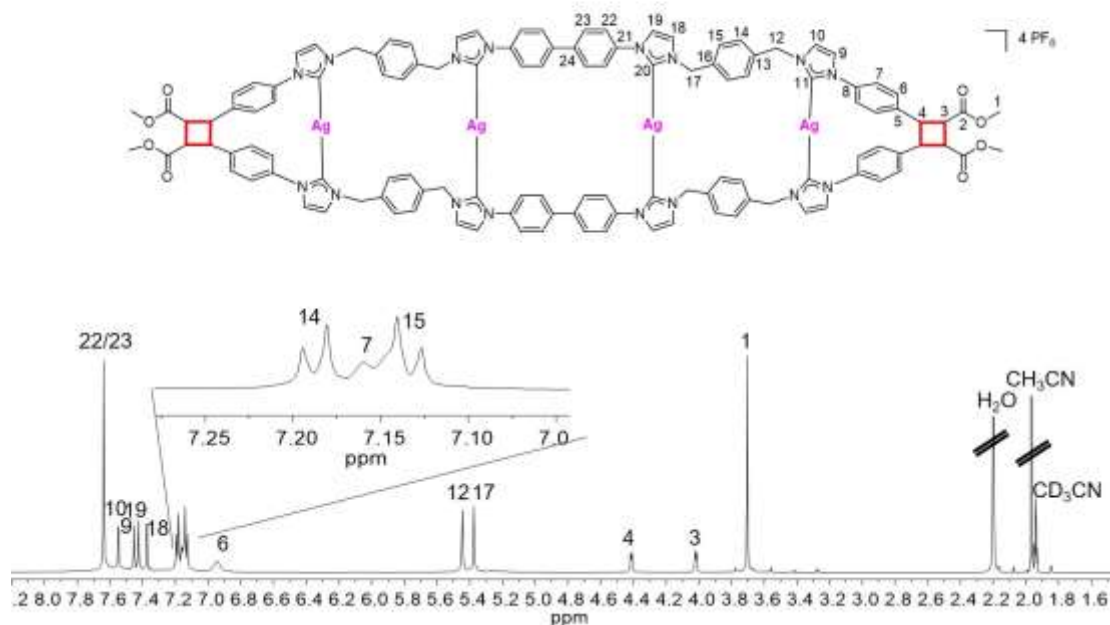

**Fig. S19**  $^1\text{H}$  NMR spectrum of  $[\text{Ag}_4(\mathbf{2b})](\text{PF}_6)_4$  (600 MHz,  $\text{CD}_3\text{CN}$ ).

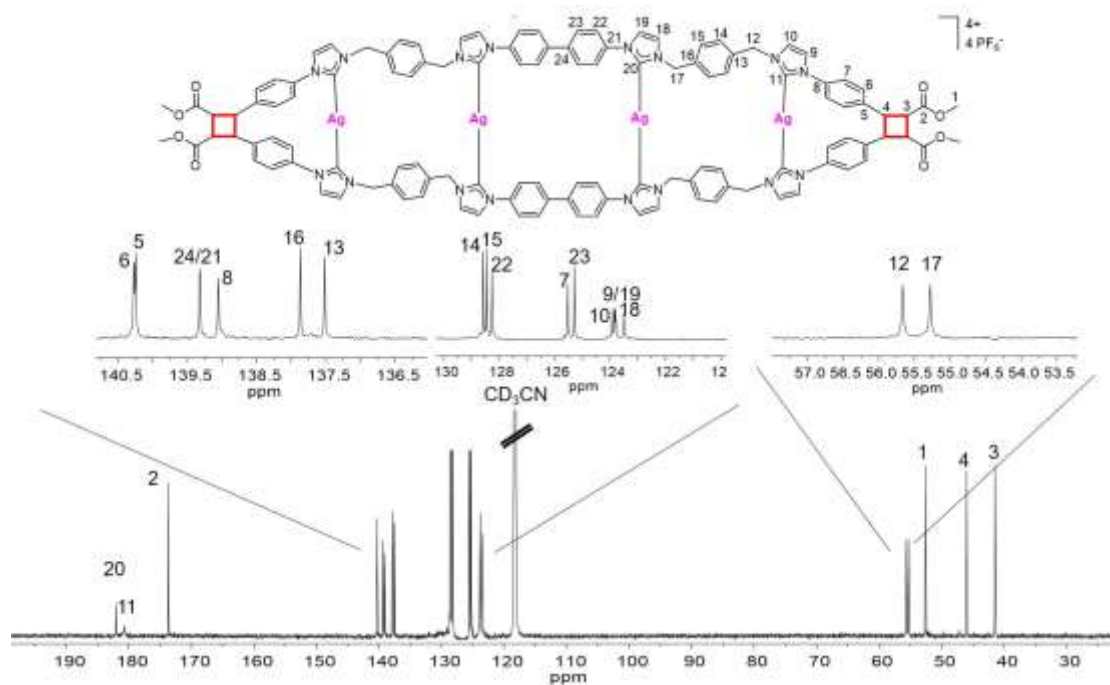

**Fig. S20**  $^{13}\text{C}\{^1\text{H}\}$  NMR spectrum of  $[\text{Ag}_4(\mathbf{2b})](\text{PF}_6)_4$  (150 MHz,  $\text{CD}_3\text{CN}$ ).

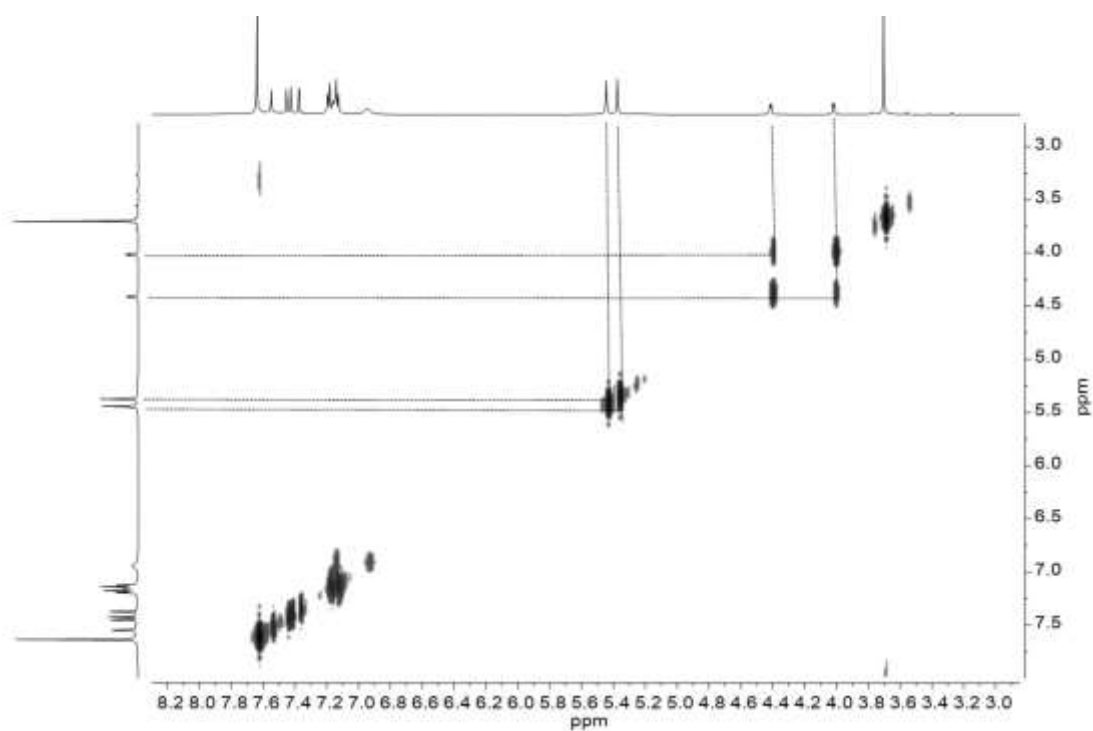

**Fig. S21**  $^1\text{H}$ - $^1\text{H}$  COSY NMR spectrum of  $[\text{Ag}_4(\mathbf{2b})](\text{PF}_6)_4$  (600 MHz,  $\text{CD}_3\text{CN}$ ).

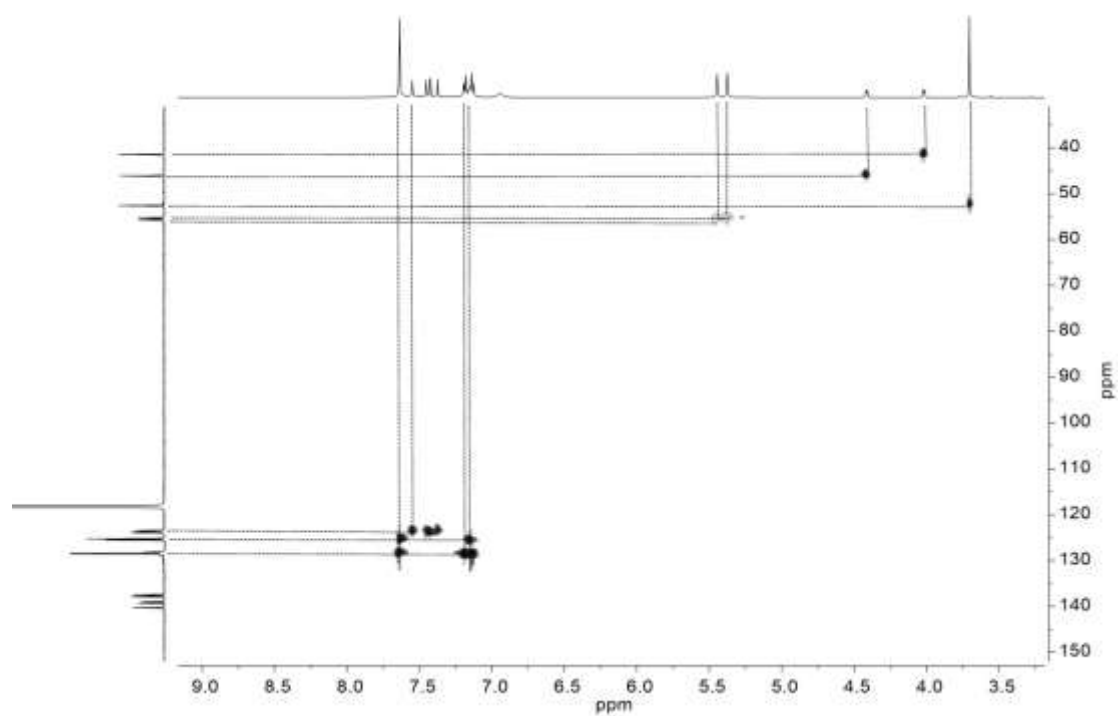

**Fig. S22**  $^1\text{H}$ - $^{13}\text{C}$  HSQC NMR spectrum of  $[\text{Ag}_4(\mathbf{2b})](\text{PF}_6)_4$  (600 MHz,  $\text{CD}_3\text{CN}$ ).

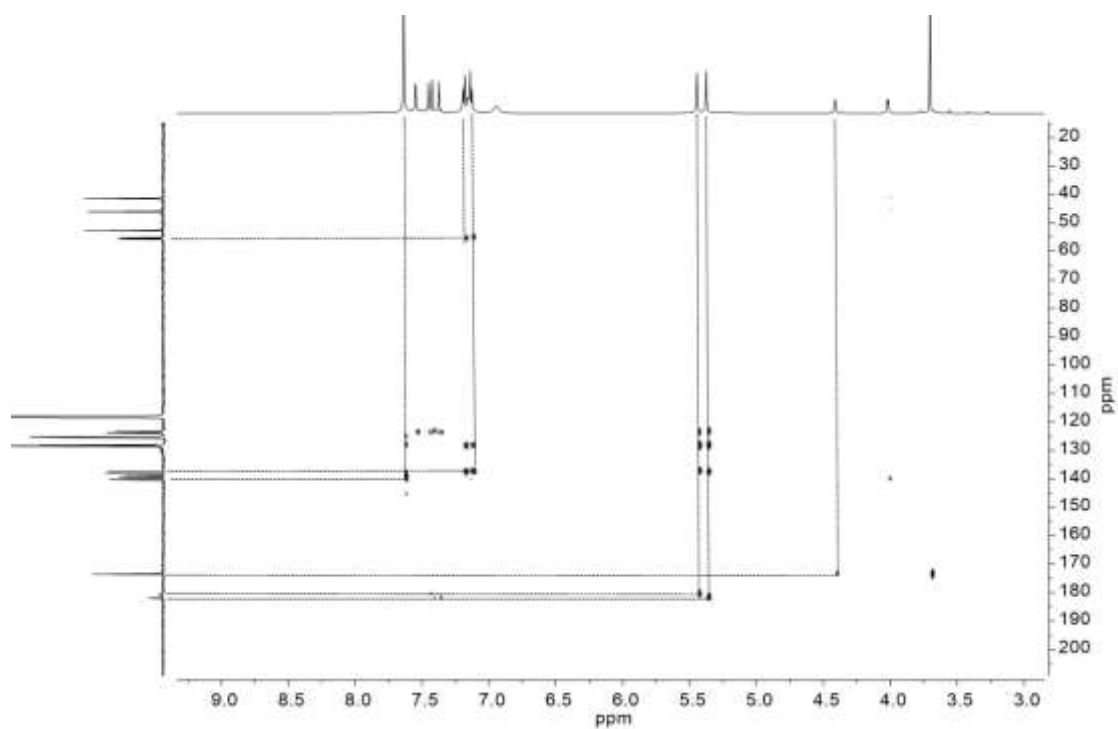

**Fig. S23**  $^1\text{H}$ - $^{13}\text{C}$  HMBC NMR spectrum of  $[\text{Ag}_4(\mathbf{2b})](\text{PF}_6)_4$  (600 MHz,  $\text{CD}_3\text{CN}$ ).

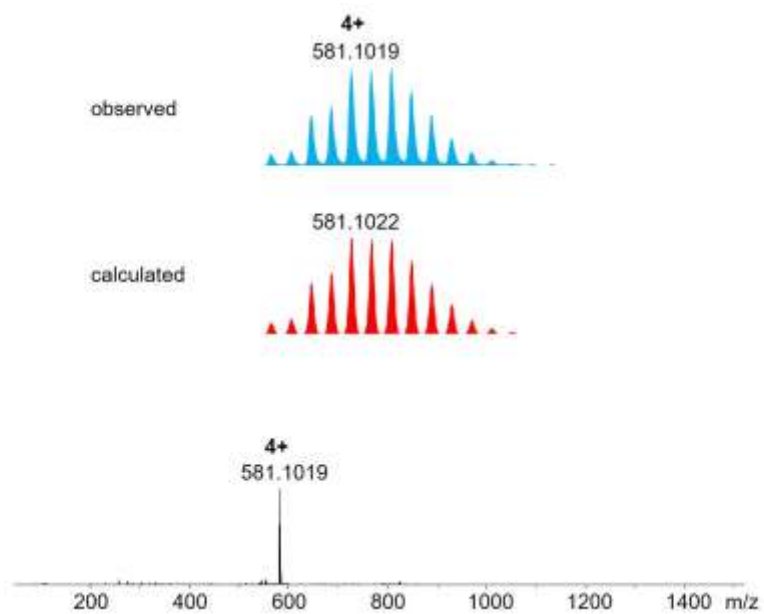

**Fig. S24** HR-ESI mass spectrum (positive ions) of  $[\text{Ag}_4(\mathbf{2b})](\text{PF}_6)_4$ .

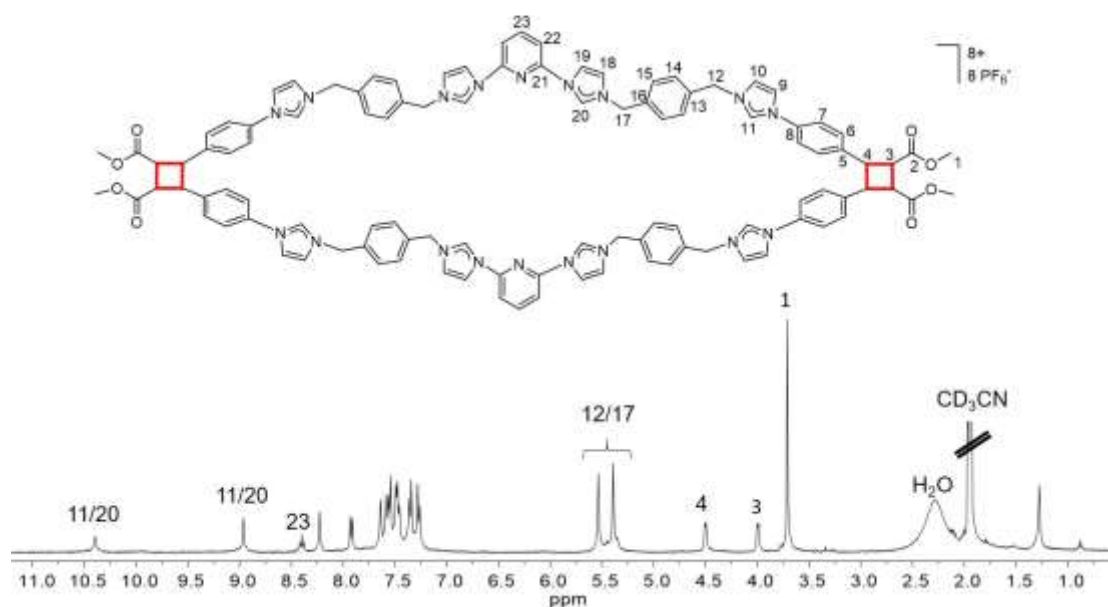

**Fig. S25**  $^1\text{H}$  NMR spectrum of  $\text{H}_8\text{-2a}(\text{PF}_6)_8$  (400 MHz,  $\text{CD}_3\text{CN}$ ).

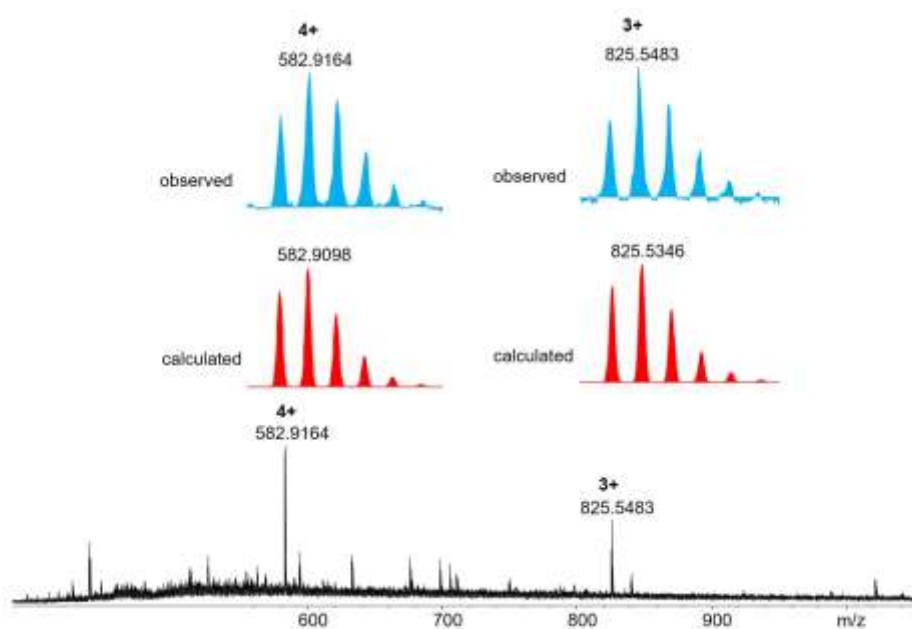

**Fig. S26** HR-ESI mass spectrum (positive ions) of  $\text{H}_8\text{-2a}(\text{PF}_6)_8$ .

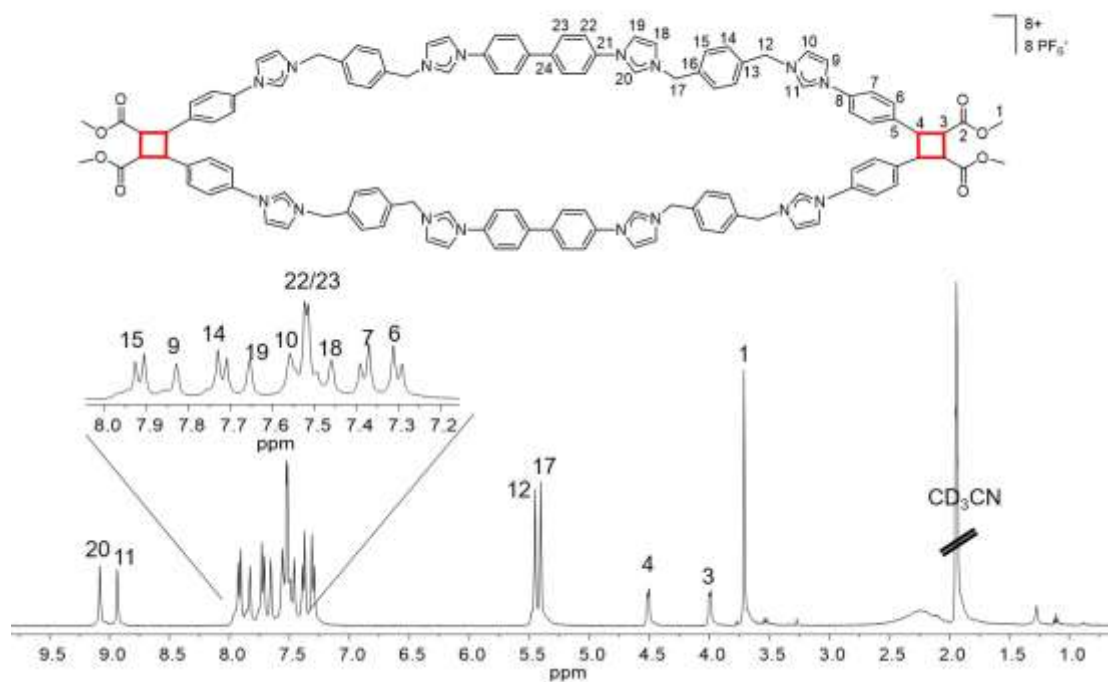

**Fig. S27**  $^1\text{H}$  NMR spectrum of  $\text{H}_8\text{-2b}(\text{PF}_6)_8$  (400 MHz,  $\text{CD}_3\text{CN}$ ).

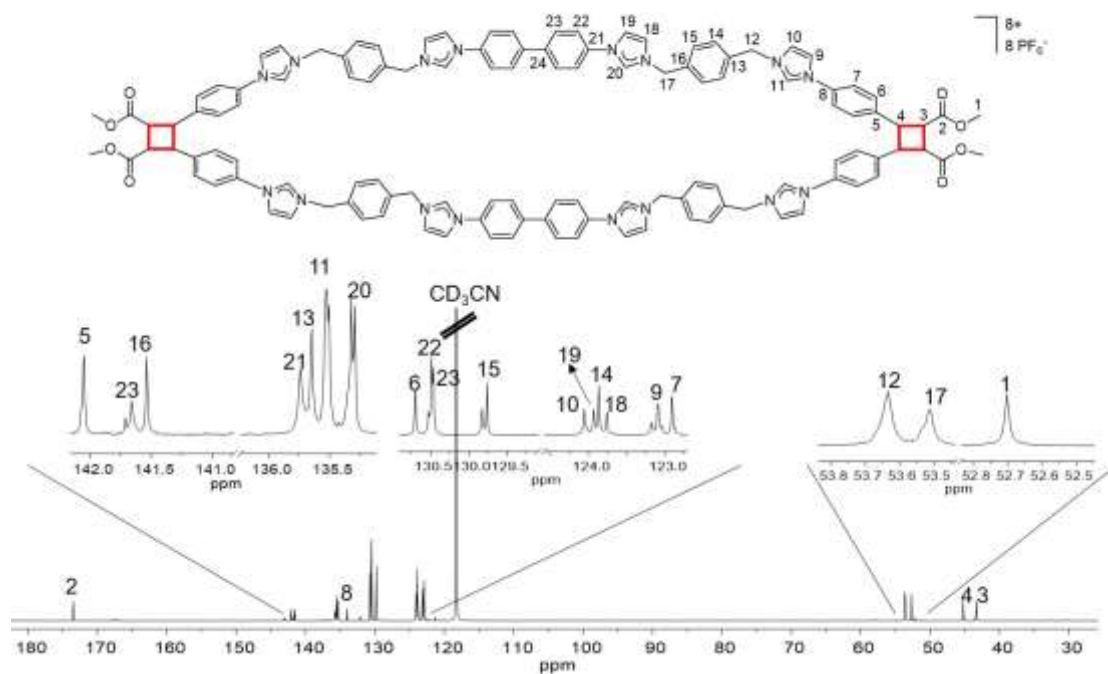

**Fig. S28**  $^{13}\text{C}\{^1\text{H}\}$  NMR spectrum of  $\text{H}_8\text{-2b}(\text{PF}_6)_8$  (150 MHz,  $\text{CD}_3\text{CN}$ ).

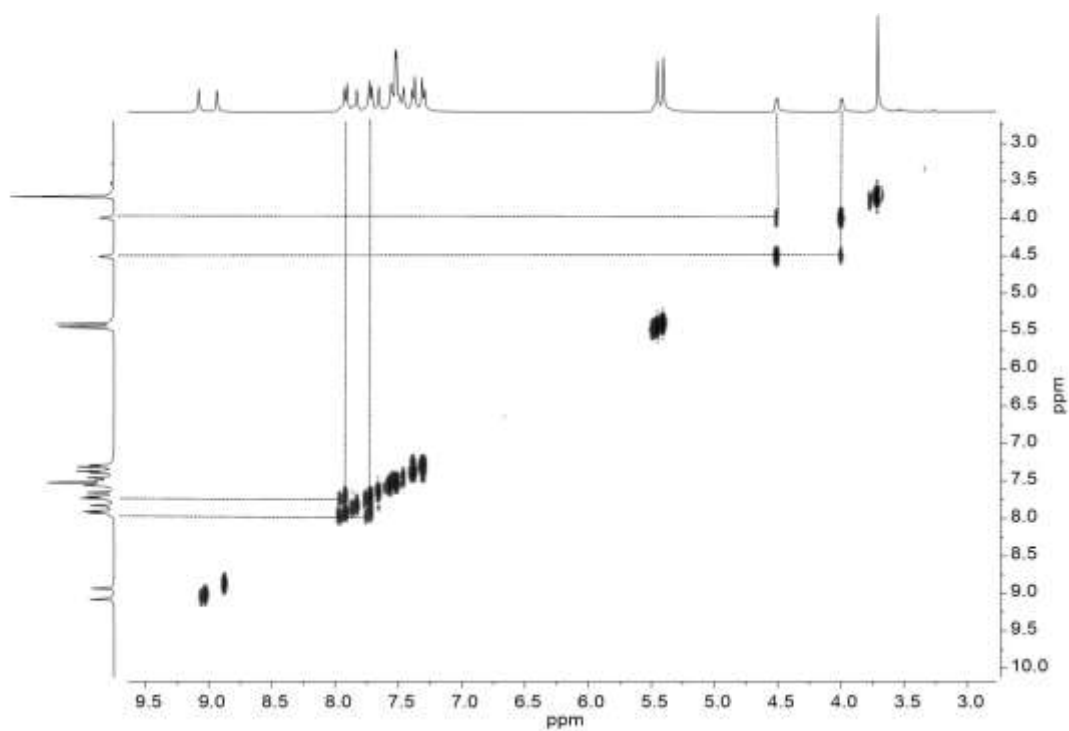

**Fig. S29**  $^1\text{H}$ - $^1\text{H}$  COSY NMR spectrum of  $\text{H}_8\text{-2b}(\text{PF}_6)_8$  (600 MHz,  $\text{CD}_3\text{CN}$ ).

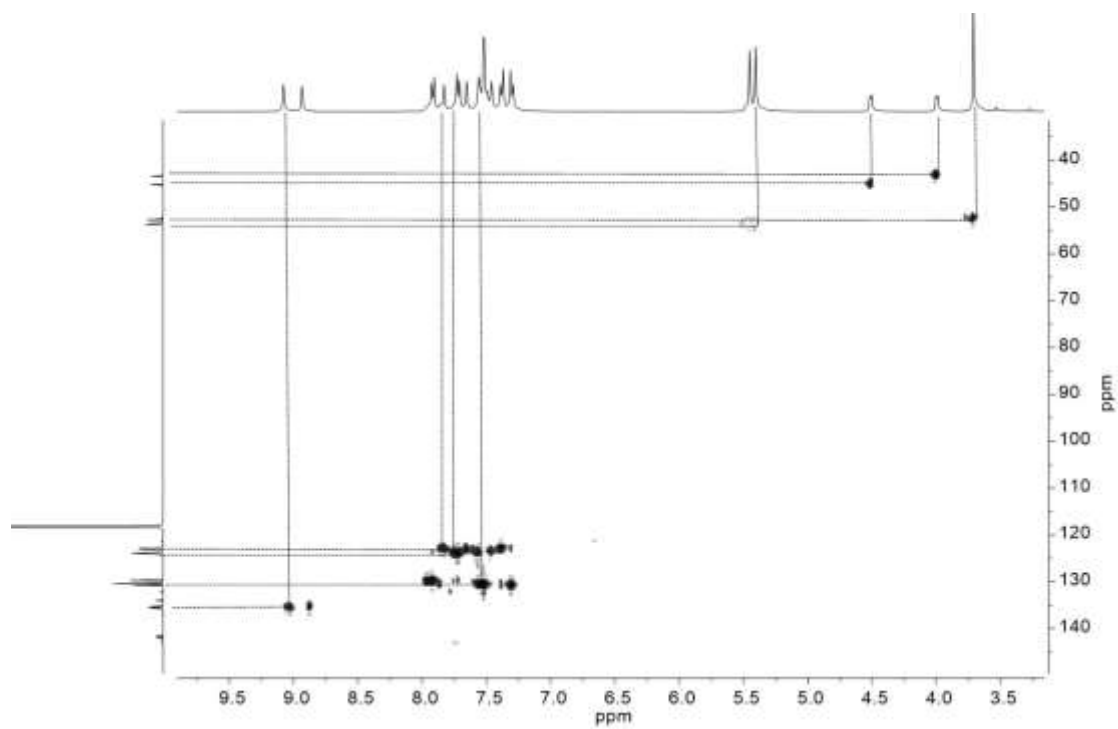

**Fig. S30**  $^1\text{H}$ - $^{13}\text{C}$  HSQC NMR spectrum of  $\text{H}_8\text{-2b}(\text{PF}_6)_8$  (600 MHz,  $\text{CD}_3\text{CN}$ ).

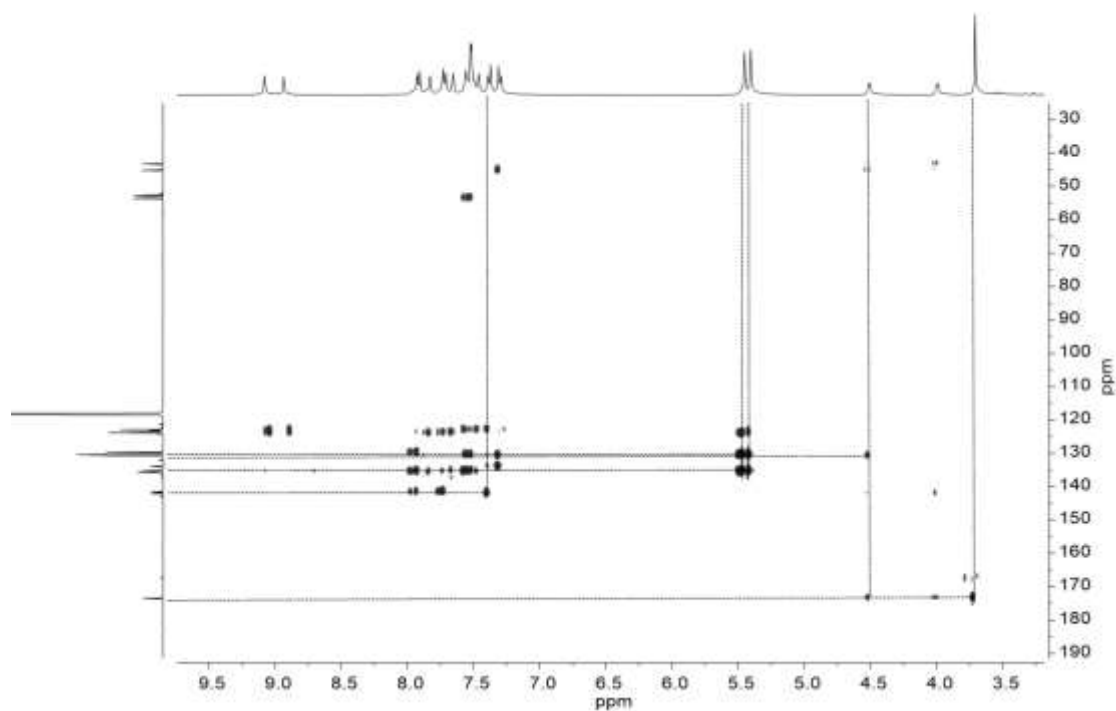

**Fig. S31**  $^1\text{H}$ - $^{13}\text{C}$  HMBC NMR spectrum of  $\text{H}_8\text{-2b(PF}_6)_8$  (600 MHz,  $\text{CD}_3\text{CN}$ ).

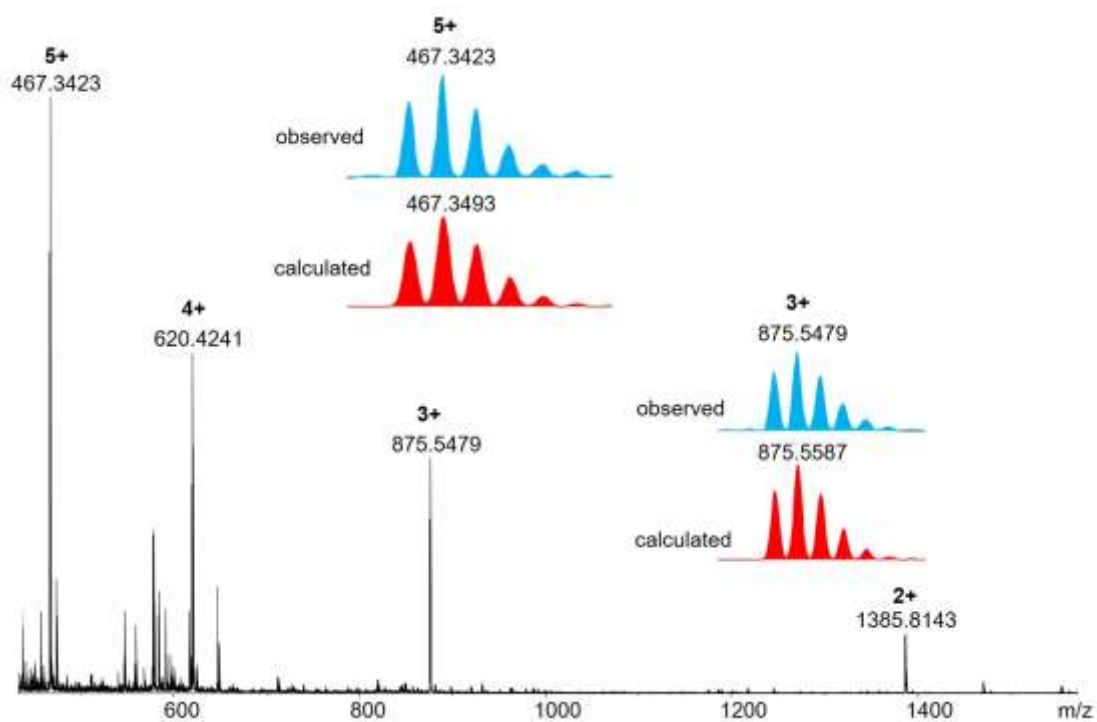

**Fig. S32** HR-ESI mass spectrum (positive ions) of  $\text{H}_8\text{-2b(PF}_6)_8$ .



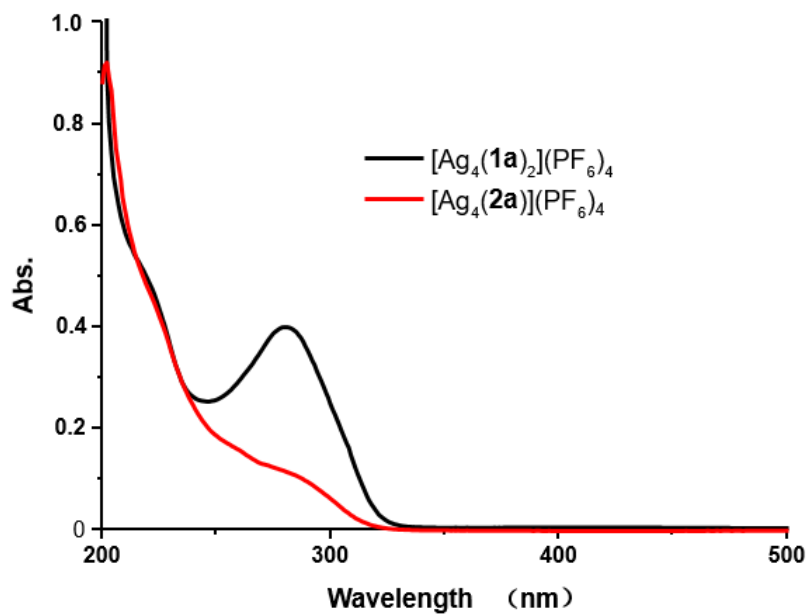

**Fig. S33** UV-Vis spectra of  $[\text{Ag}_4(\mathbf{1a})_2](\text{PF}_6)_4$  ( $5\ \mu\text{M}$ ) in  $\text{CH}_3\text{CN}$  before (dark line) and after (red line) photoreaction.

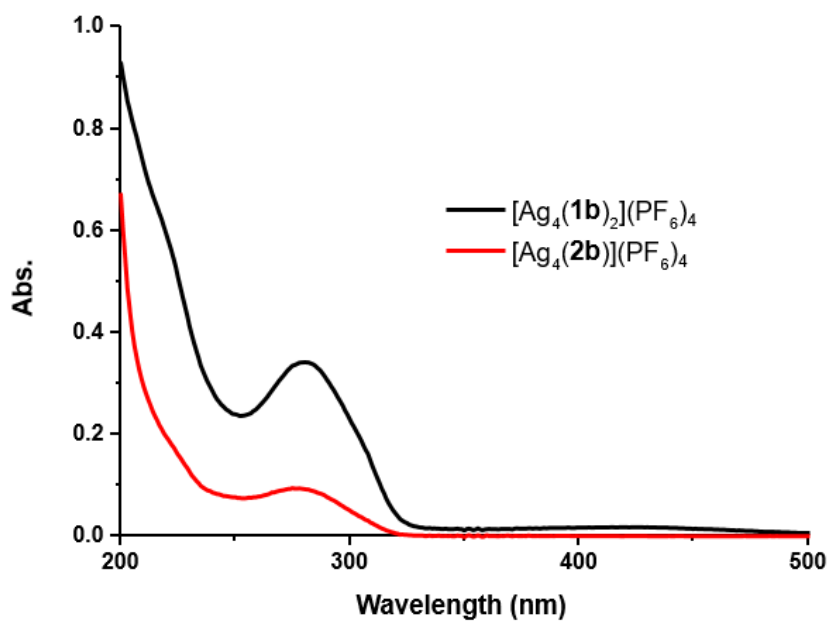

**Fig. S34** UV-Vis spectra of  $[\text{Ag}_4(\mathbf{1b})_2](\text{PF}_6)_4$  ( $5\ \mu\text{M}$ ) in  $\text{CH}_3\text{CN}$  before (dark line) and after (red line) photoreaction.

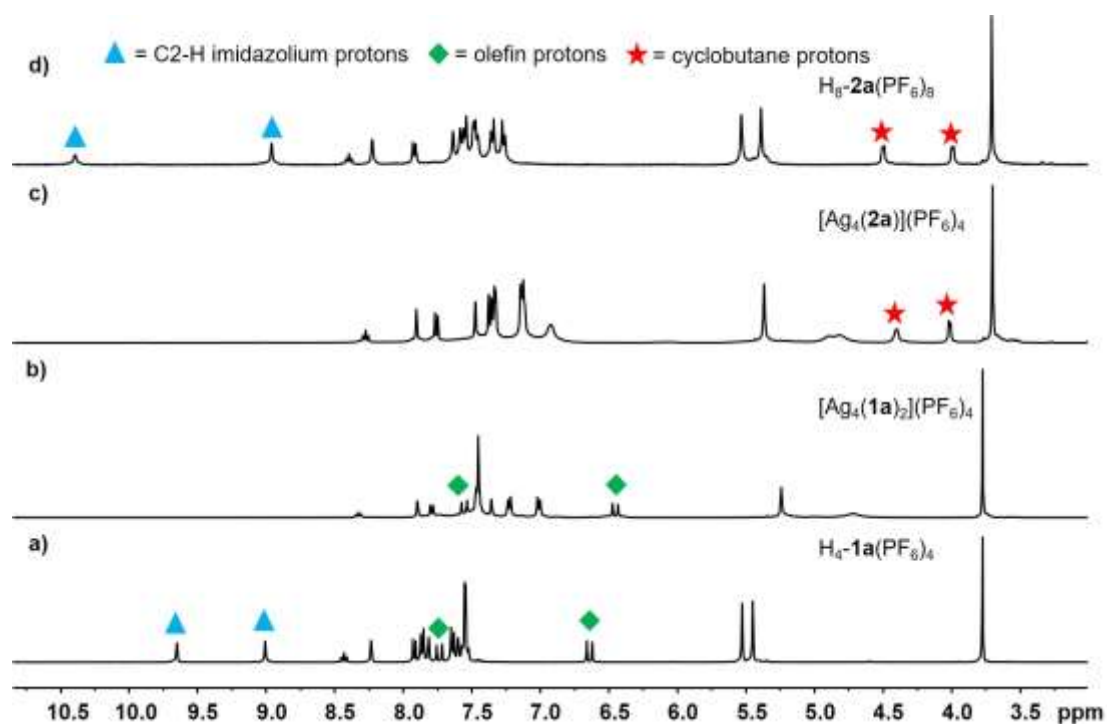

**Fig. S35** Partial  $^1\text{H}$  NMR spectra (400 MHz, 298 K) in  $\text{CD}_3\text{CN}$  of (a) tetrakisimidazolium salt  $\text{H}_4\text{-1a}(\text{PF}_6)_4$ , (b) complex  $[\text{Ag}_4(\text{1a})_2](\text{PF}_6)_4$  before irradiation, (c) complex  $[\text{Ag}_4(\text{2a})](\text{PF}_6)_4$  obtained after irradiation, (d) octakisimidazolium salt  $\text{H}_8\text{-2a}(\text{PF}_6)_8$ .

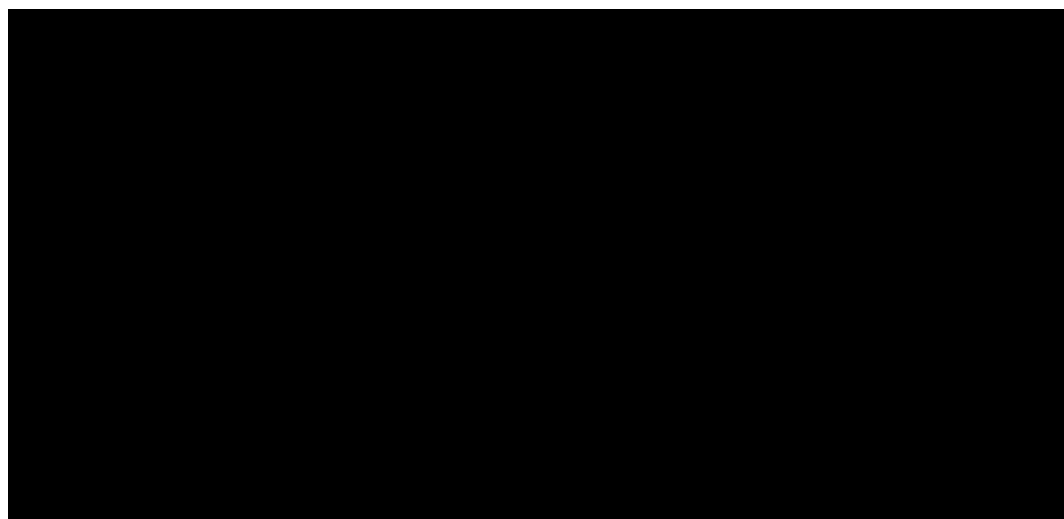

**Fig. S36** Partial  $^1\text{H}$  NMR spectra (400 MHz, 298 K) in  $\text{CD}_3\text{CN}$  of tetrakisimidazolium salt  $\text{H}_4\text{-1a}(\text{PF}_6)_4$  (a) before and (b) after irradiation.

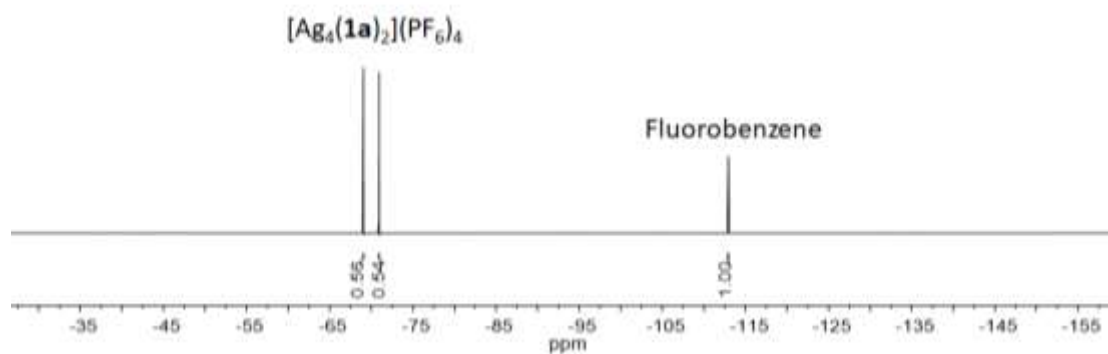

**Fig. S37** Partial  $^{19}\text{F}$  NMR spectra (400 MHz, 298 K) in  $\text{DMSO-}d_6$  of  $[\text{Ag}_4(\mathbf{1a})_2](\text{PF}_6)_4$ , with 24 equiv. fluorobenzene as internal standard.

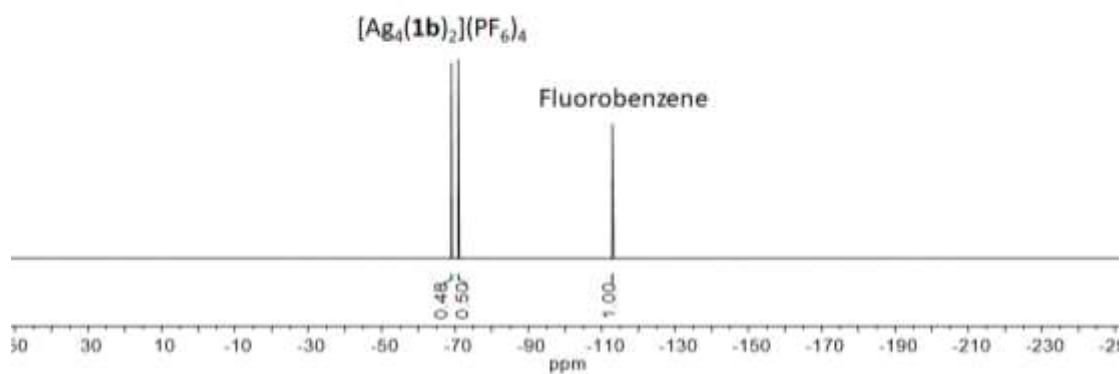

**Fig. S38** Partial  $^{19}\text{F}$  NMR spectra (400 MHz, 298 K) in  $\text{DMSO-}d_6$  of  $[\text{Ag}_4(\mathbf{1b})_2](\text{PF}_6)_4$ , with 24 equiv. fluorobenzene as internal standard.

#### 4. UV-Vis, fluorescence and $^1\text{H}$ NMR titration studies on the recognition of aromatic sulfonates

Stock solutions of **G8**, **G9** ( $10\ \mu\text{M}$ ) and  $\text{H}_8\text{-2a(PF}_6)_8$  ( $60\ \text{mM}$ ) were prepared in DMSO to each measurement, respectively. A solution of **G8** or **G9** ( $2.4\ \text{mL}$ ) was added to the quartz cell and then the spectrum was recorded at room temperature when excited at  $260\ \text{nm}$ . An aliquot of a  $\text{H}_8\text{-2a(PF}_6)_8$  solution ( $4\ \mu\text{L}$ ,  $0.1\ \text{equiv.}$ ) was added to the solution of **G8** or **G9**, and the spectra were recorded.

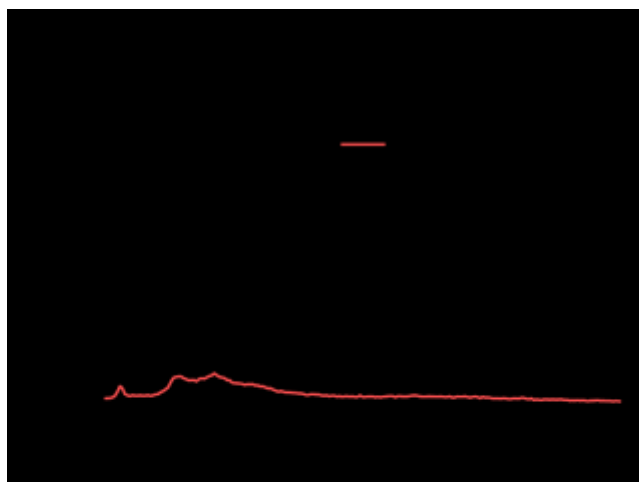

**Fig. S39** Fluorescence spectra of sodium naphthalene-2,6-disulfonate **G8** ( $\lambda_{\text{ex}} = 260\ \text{nm}$ ,  $c = 15\ \mu\text{M}$ ) with and without addition of  $1.0\ \text{equiv.}$   $\text{H}_8\text{-2a(PF}_6)_8$  in DMSO.

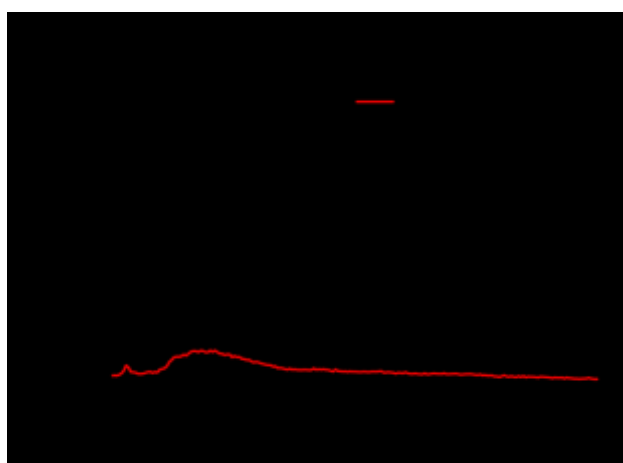

**Fig. S40** Fluorescence spectra of sodium naphthalene-1,6-disulfonate **G9** ( $\lambda_{\text{ex}} = 260\ \text{nm}$ ,  $c = 15\ \mu\text{M}$ ) with and without addition of  $1.0\ \text{equiv.}$   $\text{H}_8\text{-2a(PF}_6)_8$  in DMSO.

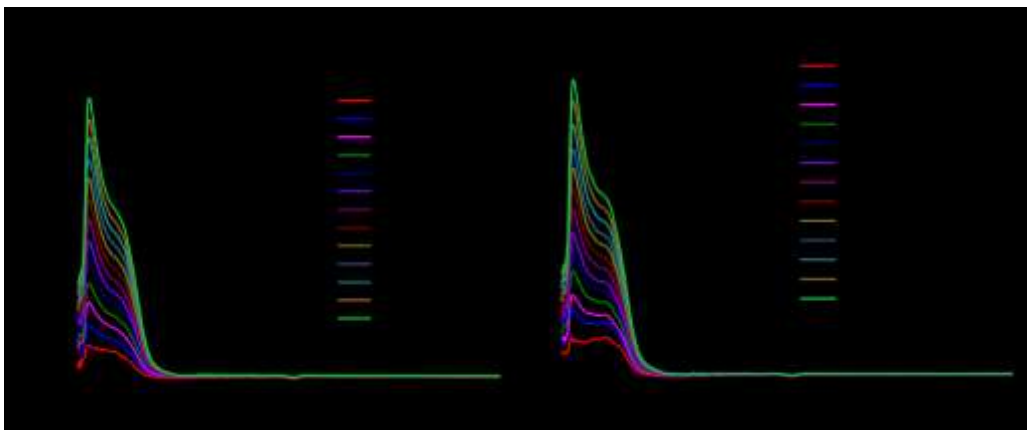

**Fig. S41** UV-Vis titration of (a) **G8** and (b) **G9** with gradual addition of  $\text{H}_8\text{-2a(PF}_6)_8$  in DMSO.

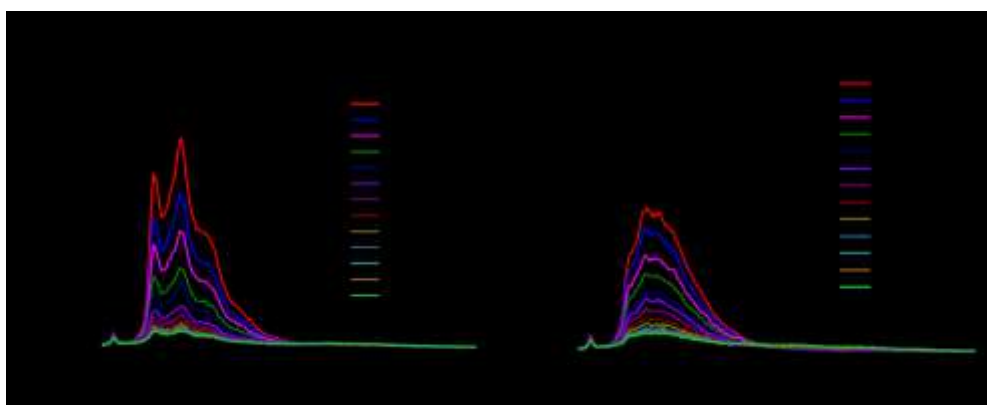

**Fig. S42** Fluorescence titration of (a) **G8** ( $\lambda_{\text{ex}} = 260 \text{ nm}$ ,  $c = 10 \mu\text{M}$ ) and (b) **G9** ( $\lambda_{\text{ex}} = 260 \text{ nm}$ ,  $c = 10 \mu\text{M}$ ) with gradual addition of  $\text{H}_8\text{-2a(PF}_6)_8$  in DMSO.

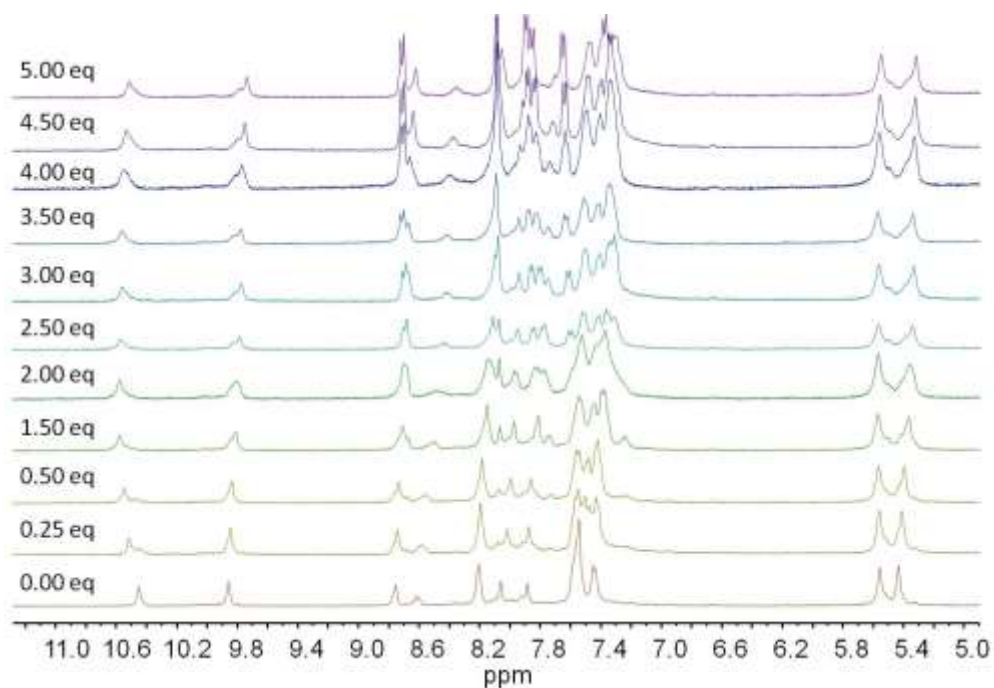

**Fig. S43** Partial  $^1\text{H}$  NMR spectra of  $\text{H}_8\text{-2a}(\text{PF}_6)_8$  (3.4 mM) upon titration **G9** in  $\text{DMSO-}d_6$  at room temperature.

## 5. References

- (1) L. Zhang, R. Das, C.-T. Li, Y.-Y. Wang, F. E. Hahn, K. Hua, L.-Y. Sun and Y.-F. Han, C<sub>3</sub>-Symmetric Assemblies from Trigonal Polycarbene Ligands and  $\text{M}^{\text{I}}$  Ions for the Synthesis of Three-Dimensional Polyimidazolium Cations, *Angew. Chem. Int. Ed.*, 2019, **58**, 13360–13364.
